# Supplementary material for: Proton reduction by a bimetallic zinc selenolate electrocatalyst
Source: Royal Society of Chemistry journal article supplement (doi:10.1039/d1ra08614f), 2022-01-01
Supplement: d1ra08614f3.pdf [file d1ra08614f3.pdf]

**Supporting Information**

**Proton Reduction by Bimetallic Zinc Selenolate Electrocatalyst**

*Aditya Upadhyay,<sup>a</sup> Saurav K. V.,<sup>a</sup> Evelin Lilly Varghese,<sup>a</sup> Ananda S. Hodage,<sup>a</sup> Amit Paul,<sup>a</sup>  
Mahendra Kumar Awasthi,<sup>b</sup> Sanjay Kumar Singh,<sup>b</sup> and Sangit Kumar<sup>\*</sup>*

<sup>a</sup> Department of Chemistry, Indian Institute of Science Education and Research, Bhopal By-Pass Road, Bhauri, Bhopal 462 066, Madhya Pradesh, India

<sup>b</sup> Department of Chemistry, Indian Institute of Technology Indore, Khandwa Road, Simrol, Indore 453552, Madhya Pradesh, India

## Table of Contents

### Supplementary Test

|                                                                                             |         |
|---------------------------------------------------------------------------------------------|---------|
| Methods and experimental details                                                            | S3      |
| Statistical Analysis                                                                        | S3-S5   |
| $^1\text{H}$ , $^{13}\text{C}$ , $^{77}\text{Se}$ and mass spectra of catalysts             | S6–S13  |
| Cyclic Voltammetry bimetallic zinc selenolate <b>1</b> under cathodic potential             | S14     |
| DPV study of bimetallic zinc selenolate <b>1</b> and CV study of diselenide ligand <b>3</b> | S15     |
| CV of <b>1</b> and <b>3</b> at various scan rates                                           | S16-S17 |
| CV of <b>1</b> at various concentration of AcOH HER                                         | S18     |
| Tafel analysis for HER                                                                      | S19     |
| CV of <b>1</b> at 12mM acetic acid concentration and under various scan rates               | S20     |
| CV of <b>1</b> at different concentration in cathodic direction                             | S21     |
| CV of <b>3</b> with variation in AcOH concentration                                         | S22     |
| CV of <b>3</b> at 14mM acetic acid concentration and under various scan rates               | S23     |
| CV of $\text{ZnCl}_2$                                                                       | S24     |
| Heterogeneous study catalyst <b>1</b> under anodic and cathodic potential                   | S25     |
| CPE analysis of <b>1</b> for HER and post electrolysis analysis by UV-Vis                   | S26     |
| Comparison by FTIR analysis of electrolytic solution before and after CPE                   | S27     |
| UV of <b>1</b> during HER                                                                   | S27     |
| CPE study of catalyst <b>1</b> under heterogeneous condition and post electrolysis analysis | S28     |
| Hydrogen quantification and faradic efficiency                                              | S29-S32 |
| Post electrolysis dip of <b>1</b> under cathodic potential                                  | S33     |
| Spectroelectrochemical analysis of <b>1</b> under cathodic potential                        | S34     |
| HOMO and LUMO of <b>1</b>                                                                   | S35     |
| HRMS of <b>1a</b>                                                                           | S36     |
| Cartesian coordinates of the optimized structure                                            | S36-S37 |
| References                                                                                  | S38     |

## Methods

**Representative Procedure.** To the stirred solution of schiff base diselenide **2** (248 mg, 0.45 mmol, 1 equiv.) in ethanol, we added sodium borohydride (76 mg, 2.0 mmol, 4 equiv) to generated in-situ selenol and stirred the solution up to 4 h at room temperature. Then we added zinc chloride (122 mg, 0.9 mmol, 2 equiv) and stirred the solution for 2 h. After that, the solvent was removed by the rotatory evaporator, and the solid residue was washed with aqueous sodium bicarbonate solution several times to afford a light yellow colored novel bimetallic zinc selenolate complex **1** in (230 mg) 75% yield. Crystallization was done in DMSO water (2:1) mixture to afford yellow-colored crystals.

**Electrochemistry.** A potentiostat (CHI700E Biopotentiostat Instrument) was used for electrochemical measurements. The three-electrode electrochemical cell consisted of a Glassy carbon (3 mm Diameter, 0.07 cm<sup>2</sup>) as the working electrode, a nonaqueous Ag/AgNO<sub>3</sub> (10 mM AgNO<sub>3</sub>) and aqueous Ag/AgCl (0.1 M KCl) as a reference electrode, and a platinum wire as a counter electrode were used for the electrochemical measurements. All experiments were repeated at least twice to check their reproducibility.

**Determination of transfer coefficient ( $\alpha$ ):** Using Laviron's method,<sup>2</sup> from the cathodic and anodic peak potentials, the transfer coefficient ( $\alpha$ ) can be determined using the eq (1) and (2):

$$E_{pc} = E - \left(\frac{RT}{\alpha nF}\right) \ln \left[\frac{\alpha nF}{RTk_{app}}\right] - \left(\frac{RT}{\alpha nF}\right) \ln v \quad (1)$$

$$E_{pa} = E - \left(\frac{RT}{\alpha nF}\right) \ln \left[\frac{\alpha nF}{RTk_{app}}\right] - \left(\frac{RT}{(1-\alpha)nF}\right) \ln v \quad (2)$$

The plot of  $E_{pc}$  and  $E_{pa}$  with respect to  $\ln(v)$  is linear. The ratio of the slopes of the cathodic and anodic peak potentials yields the value of  $\alpha$  (Figure S6C and S7C). The result shows that the catalyst **1** and ligand **3** has  $\alpha$  value of 0.4 and 0.3.

### Determination of diffusion constant ( $D_0$ ) for zinc selenolate catalyst 1:

From the Randles-Ševčík equation, eq (3), for  $n_p$  electron diffusional process, it was possible to obtain an apparent diffusion coefficient,  $D_0$ .<sup>1</sup>

$$i_p = 2.69 \times 10^5 A n_p^{1.5} [cat] \sqrt{D_0 \nu \alpha} \quad (3)$$

Here,  $i_p$  = peak current ( $\mu A$ ),  $n_p$  = total number of electrons transferred,  $A$  = electrode area in  $cm^2$ ,  $[cat]$  = bulk concentration of the analyte ( $mol/cm^3$ ),  $\alpha$  = transfer coefficient of the catalyst and calculated by taking a slope from the plot of  $E_{p,c}$  vs  $\ln \nu$ ,<sup>2</sup>  $D_0$  = diffusion coefficient ( $cm^2/s$ ),  $\nu$  = scan rate (V/s).

From  $i_p$  vs square root of scan rate plot, eq (3) can be remodified as

$$\text{Slope} = 2.69 \times 10^5 A n_p^{1.5} [cat] \sqrt{D_0 \nu \alpha}$$

$$D_0 = \left( \frac{\text{slope}}{2.69 \times 10^5 A n_p^{1.5} [cat] \sqrt{\alpha}} \right)^2$$

Here,  $A=0.07 \text{ cm}^2$ ,  $n_p = 2$ ,  $[cat]=0.000001 \text{ mol/dm}^3$ ,  $\alpha \approx 0.4$  (for 1) and 0.3 (for 3)

For HER: slope (Figure S6) =  $77.8 \times 10^{-6}$

$D_0 = 5.3 \times 10^{-6} \text{ cm}^2/\text{s}$  in MeOH

For ligand: slope (Figure S7) =  $128.3 \times 10^{-6}$

$D_0 = 19.3 \times 10^{-6} \text{ cm}^2/\text{s}$  in MeOH

### HER equation for TOF calculation:

The relationship between the catalytic current ( $i_{cat}$ ), catalyst concentration  $[cat]$ , acid concentration  $[H^+]$ , which is first order with respect to catalyst and second order with acid under scan rate independent condition<sup>3-4</sup> is mentioned in eq (4)

$$i_{cat} = n_{cat} F A [cat] \sqrt{D k [H^+]^2} \quad (4)$$

Where  $n_{cat}$  stands for number of electrons involved in catalysis.

After dividing eq (4) by the Randles-Ševčík equation:

$$\frac{j_{cat}}{j_p} = \frac{n_{cat} \times F}{2.69 \times 10^5 n_p^{1.5}} \sqrt{\frac{k [H^+]^2}{\nu}} \quad (5)$$

Under Pseudo first-order condition,<sup>5</sup>  $k_{obs} = k [H^+]^2$  therefore eq. (5) can be modified as

$$\frac{j_{cat}}{j_p} = \frac{n_{cat} \times F}{2.69 \times 10^5 n_p^{1.5}} \sqrt{\frac{k_{obs}}{v}} \quad (6)$$

$$\text{Or } TOF_{max}/k_{obs} = 7.77 \times \frac{n_p^3}{n_{cat}^2} \times v \times \left[ \frac{j_{cat}}{j_p} \right]^2 \quad (7)$$

At 12 mM acetic acid concentration for **1** (current density was measured after background subtraction, see figure S8):

$$j_{cat}/j_p = 6300/1557 = 4.04 \quad v = 2.0 \text{ V/s} \quad k_{obs}/TOF_{max} = 509 \text{ s}^{-1}$$

At 14 mM acetic acid concentration for ligand **3** (current density was measured after background subtraction, see figure S11C):

$$j_{cat}/j_p = 2289/1412. = 1.62 \quad v = 0.6 \text{ V/s} \quad k_{obs}/TOF_{max} = 25 \text{ s}^{-1}$$

<sup>1</sup>H NMR of 1

| Parameter                 | Value                        |
|---------------------------|------------------------------|
| 1 Data File Name          | E:/Aditya/ metal selenolate/ |
| 2 Title                   | AUY-79/ zinc complex/ 2/ f1d |
| 3 Instrument              | zinc complex.2.f1d           |
| 4 Solvent                 | spect                        |
| 5 Temperature             | DMSO                         |
| 6 Pulse Sequence          | zg30                         |
| 7 Experiment              | zg30                         |
| 8 Number of Scans         | 16                           |
| 9 Receiver Gain           | 64.0                         |
| 10 Relaxation Delay       | 1.0000                       |
| 11 Pulse Width            | 12.5000                      |
| 12 Acquisition Time       | 3.9977                       |
| 13 Acquisition Date       | 2017-01-20T10:05:04          |
| 14 Spectrometer Frequency | 400.13                       |
| 15 Lowest Frequency       | -1713.7                      |
| 16 Nucleus                | <sup>1</sup> H               |

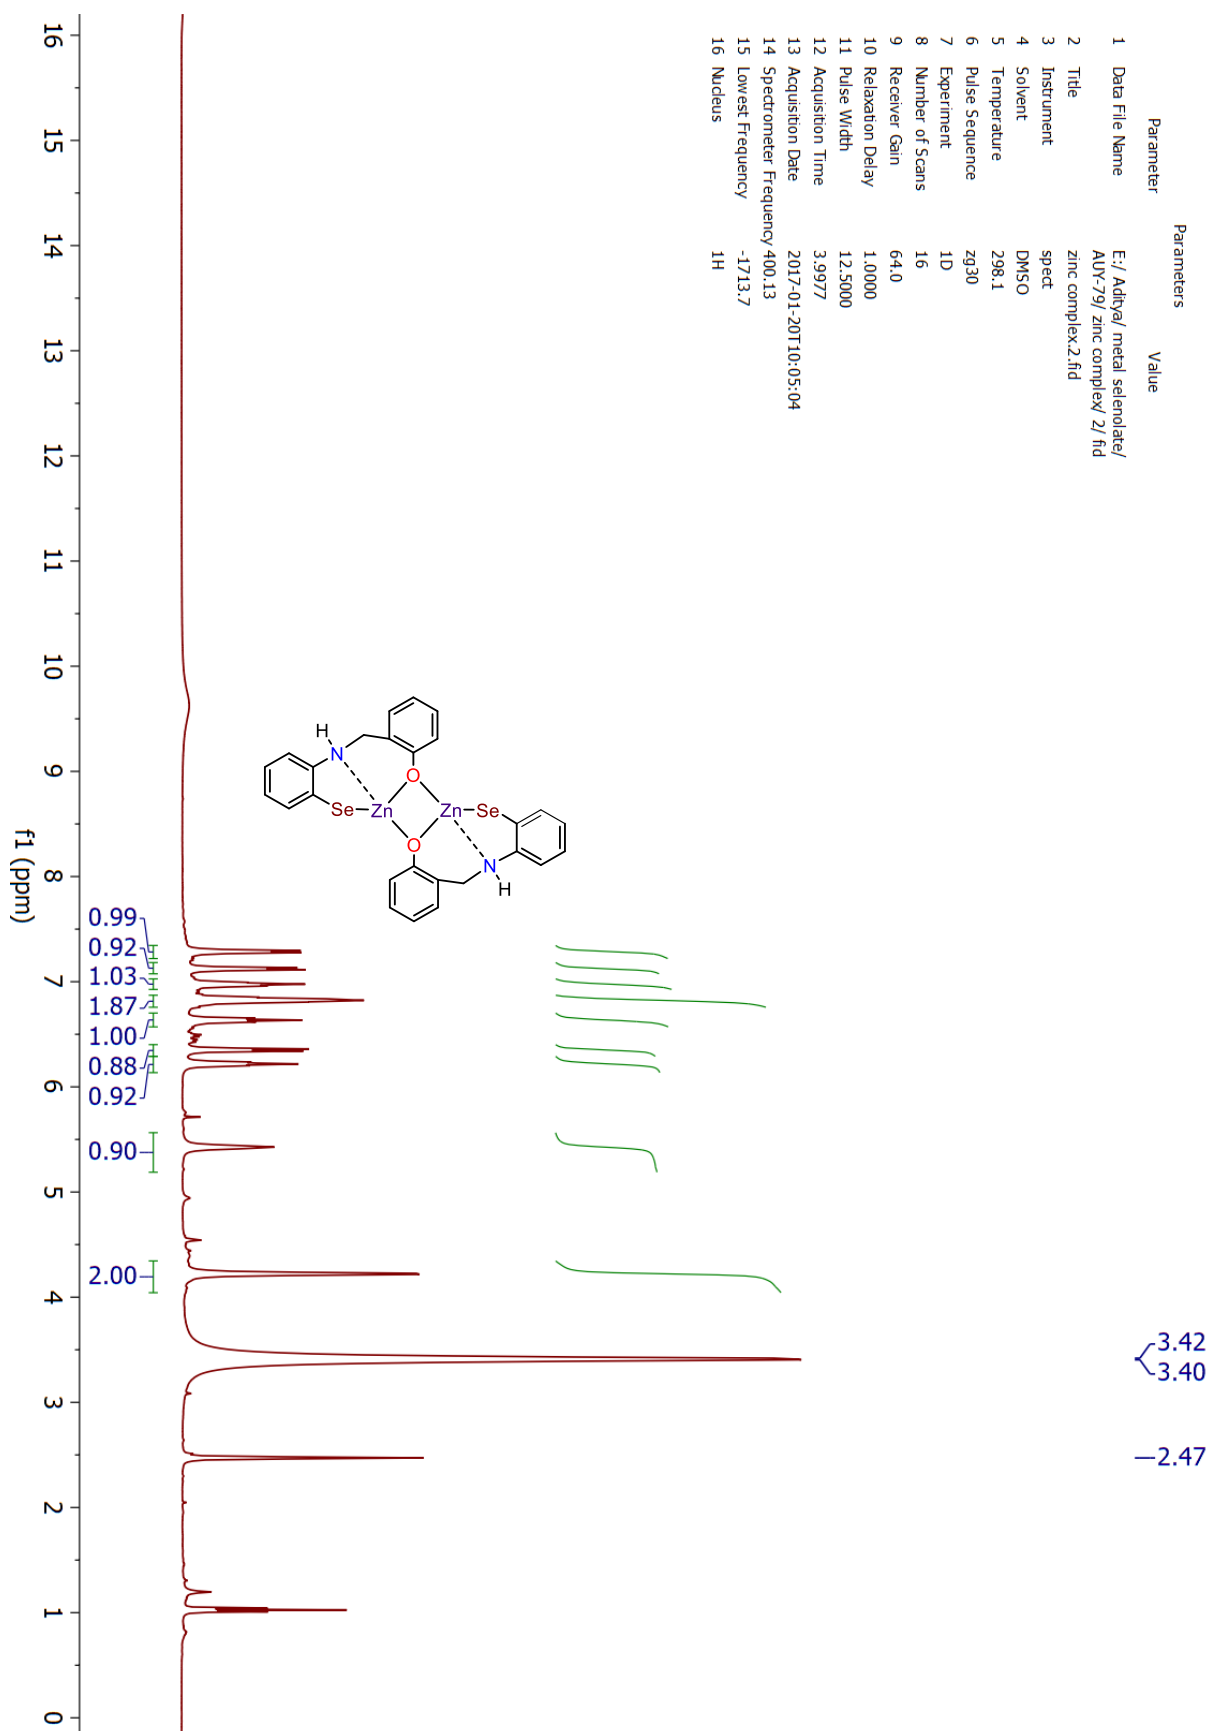

<sup>13</sup>C NMR of 1

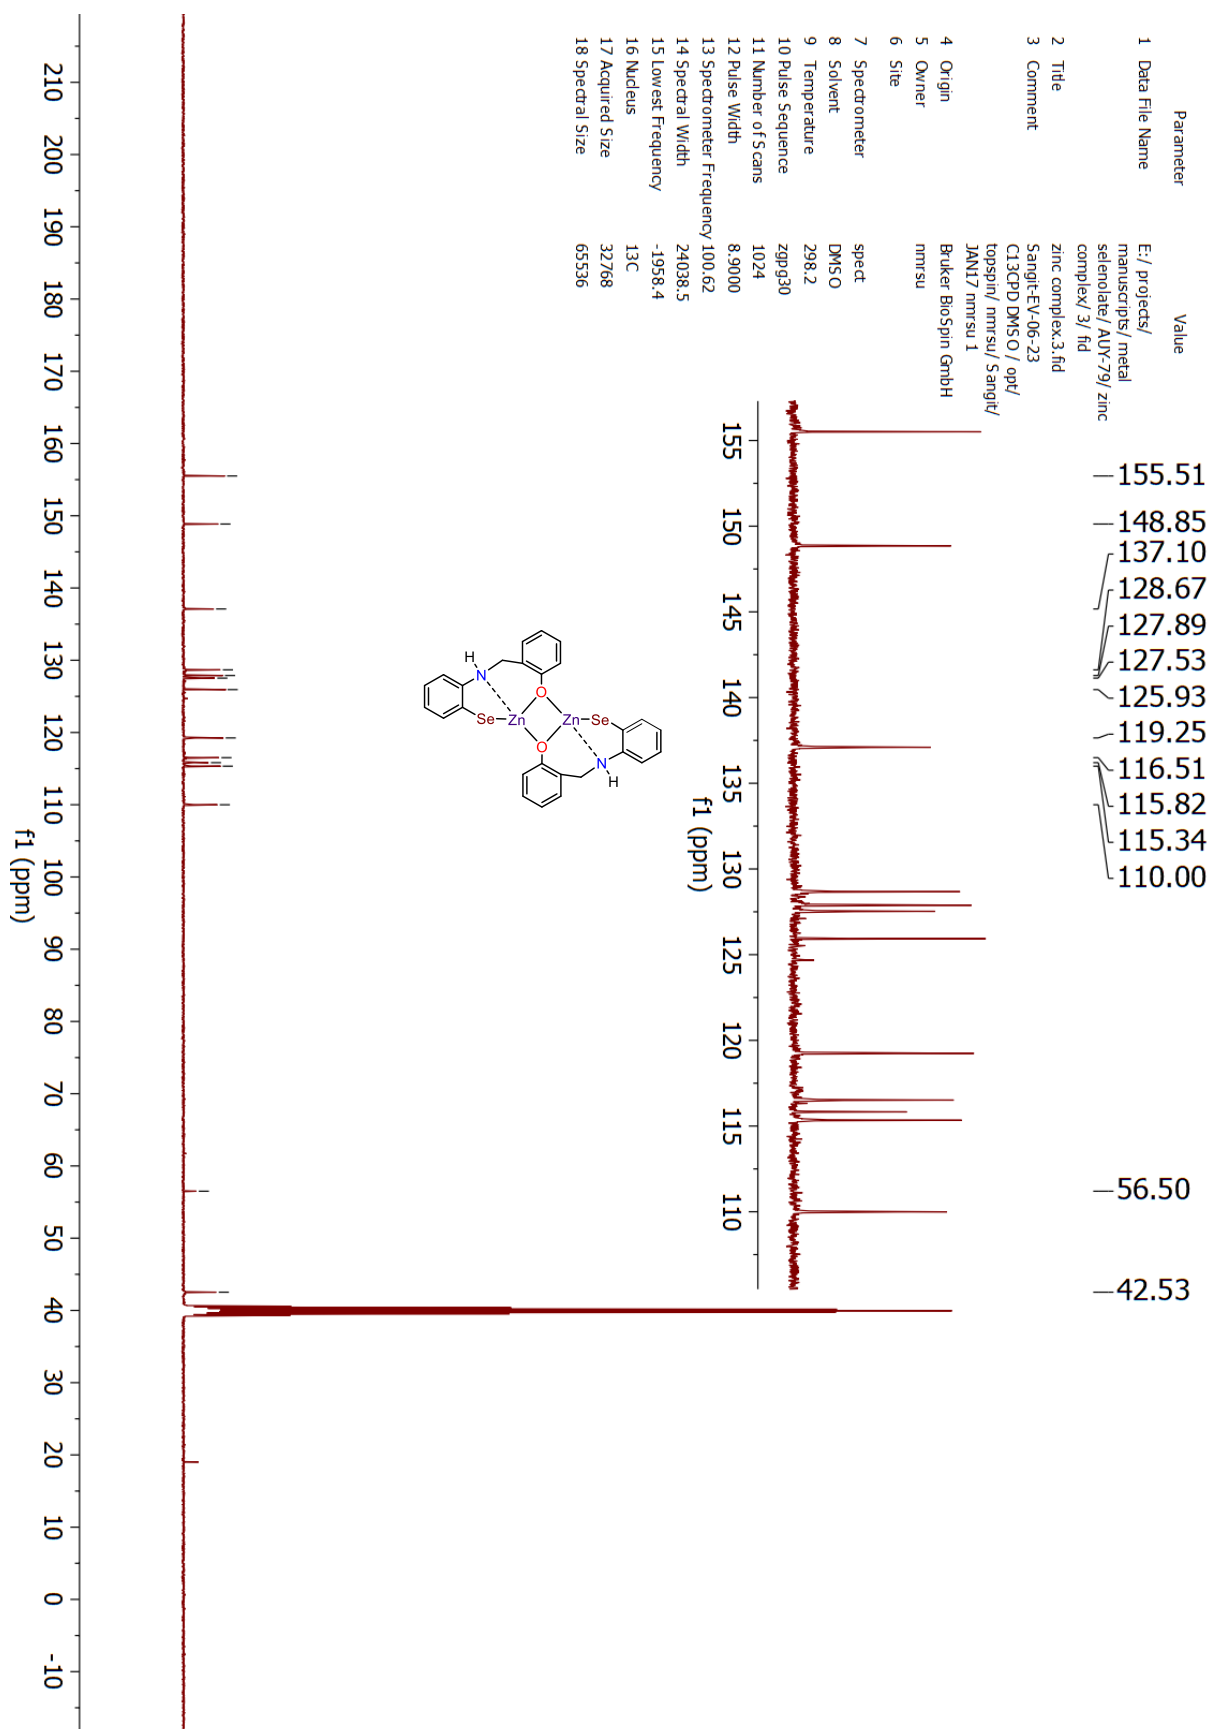

<sup>77</sup>Se NMR of 1

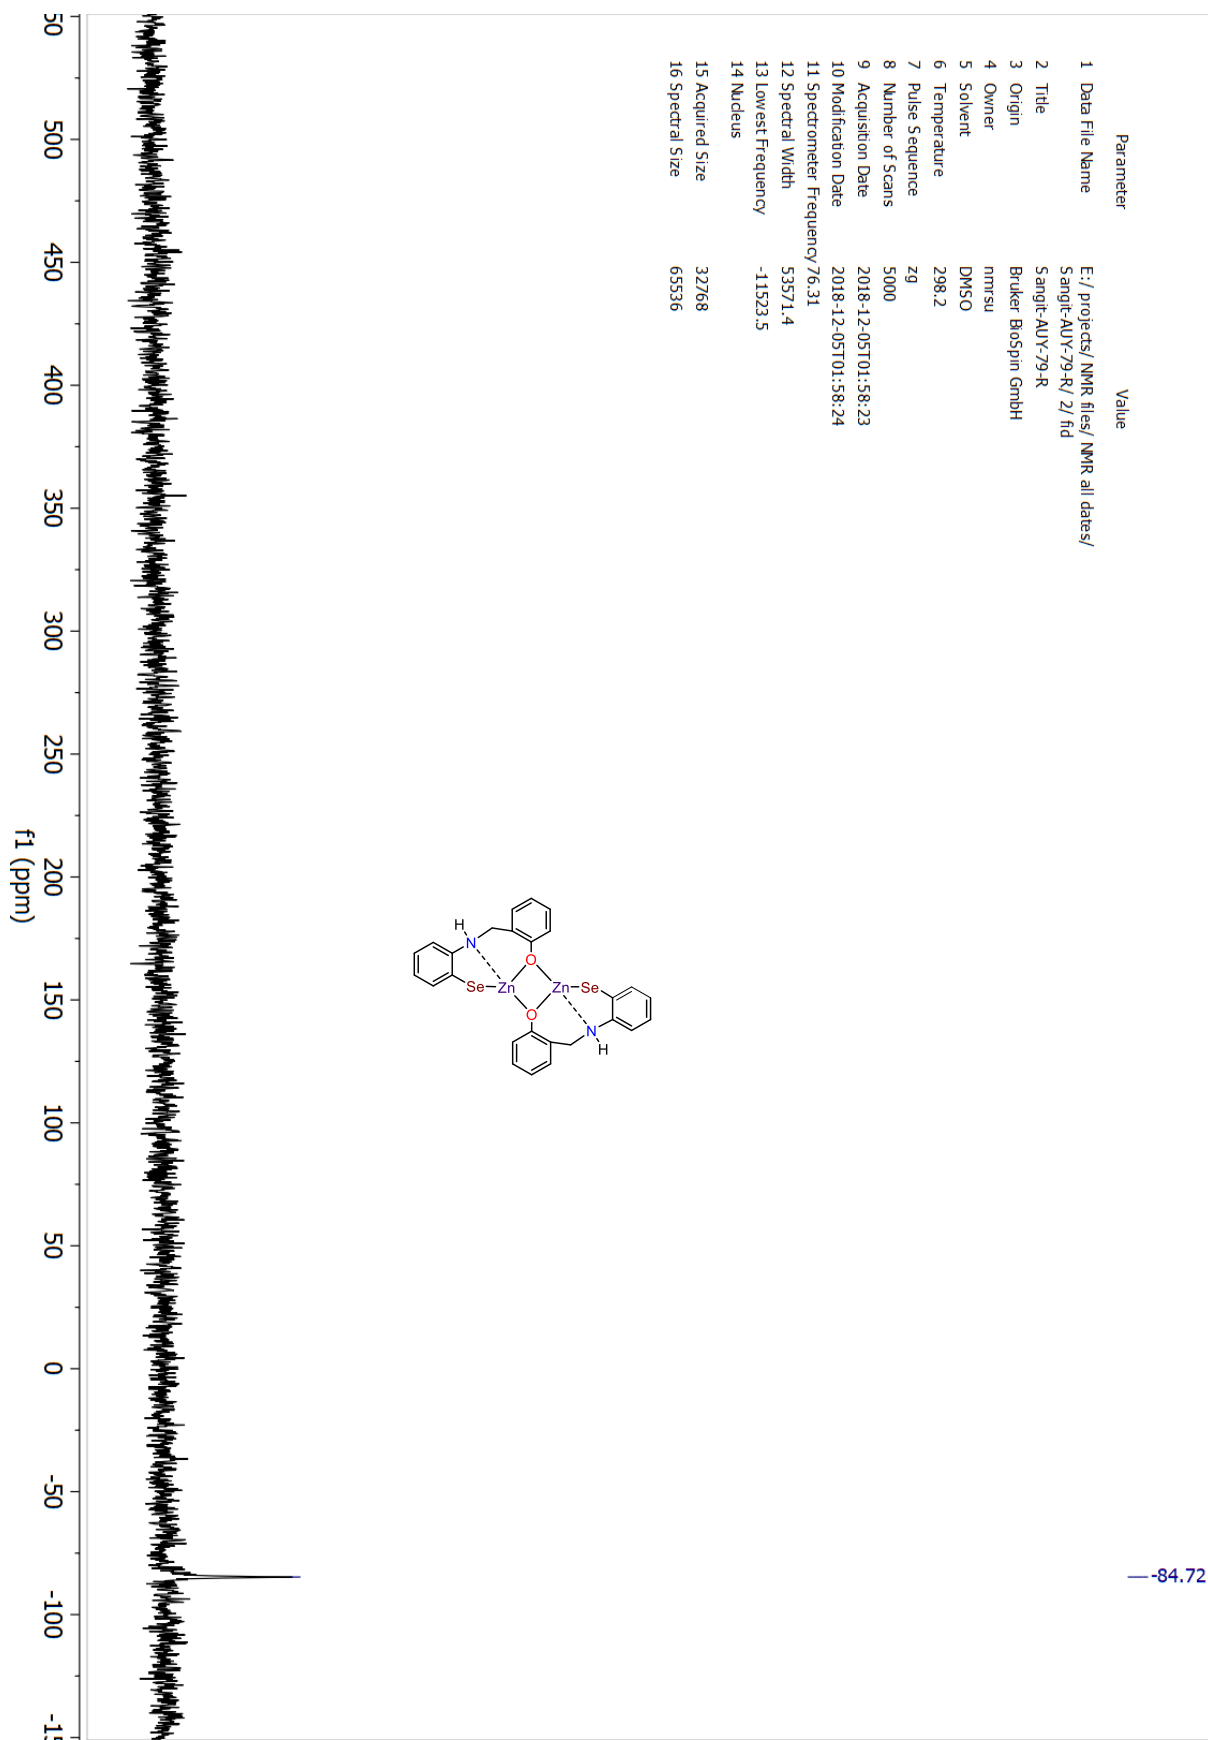



### Display Report

|                      |                                                                       |                  |                        |
|----------------------|-----------------------------------------------------------------------|------------------|------------------------|
| <b>Analysis Info</b> |                                                                       | Acquisition Date | 12/20/2018 12:28:09 PM |
| Analysis Name        | D:\Data\NEW USER DATA 2017\2018\DECEMBER\19 DEC\Dr S Kumar-AUY-79-R.d | Operator         | RUCHI                  |
| Method               | tune_low_APCI.m                                                       | Instrument       | micrOTOF-Q II 10330    |
| Sample Name          | AUY-79-R                                                              |                  |                        |
| Comment              |                                                                       |                  |                        |

|                              |            |                       |           |                  |           |
|------------------------------|------------|-----------------------|-----------|------------------|-----------|
| <b>Acquisition Parameter</b> |            |                       |           |                  |           |
| Source Type                  | APCI       | Ion Polarity          | Positive  | Set Nebulizer    | 2.5 Bar   |
| Focus                        | Not active | Set Capillary         | 4500 V    | Set Dry Heater   | 200 °C    |
| Scan Begin                   | 50 m/z     | Set End Plate Offset  | -500 V    | Set Dry Gas      | 4.0 l/min |
| Scan End                     | 3000 m/z   | Set Collision Cell RF | 300.0 Vpp | Set Divert Valve | Waste     |

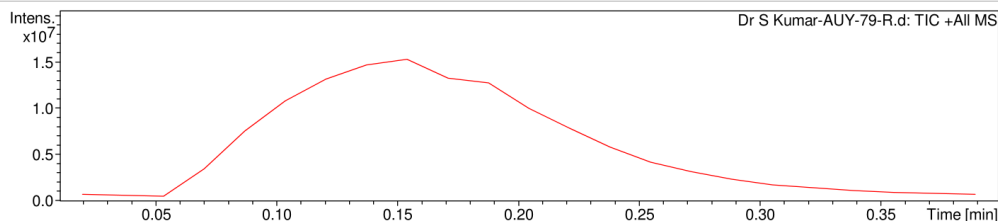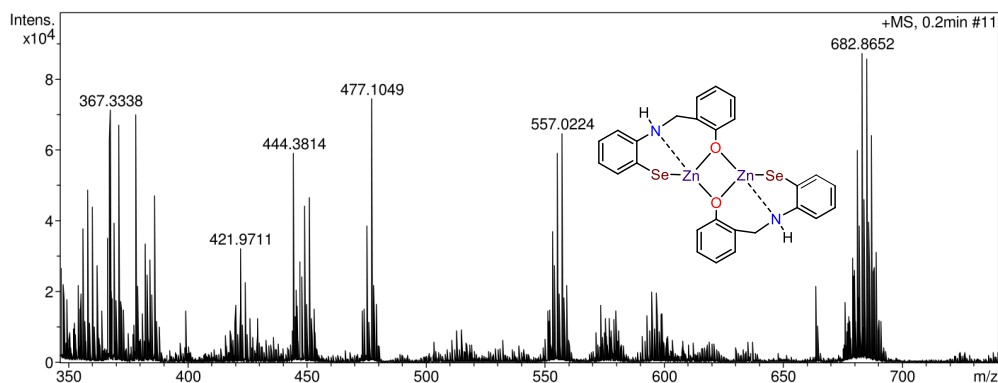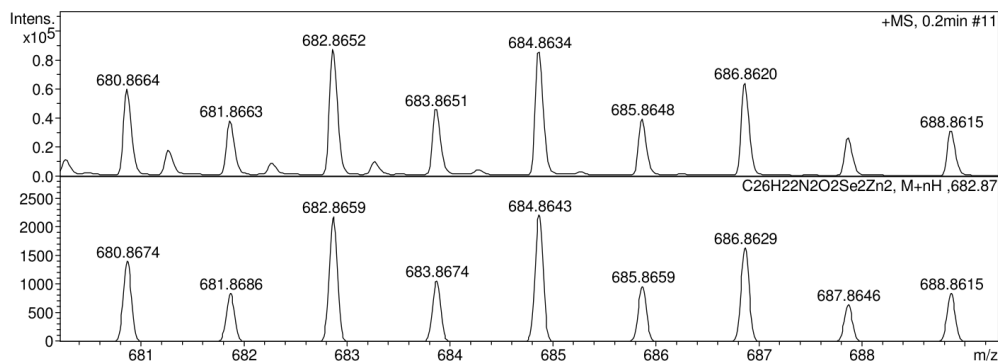

<sup>1</sup>H NMR of 4

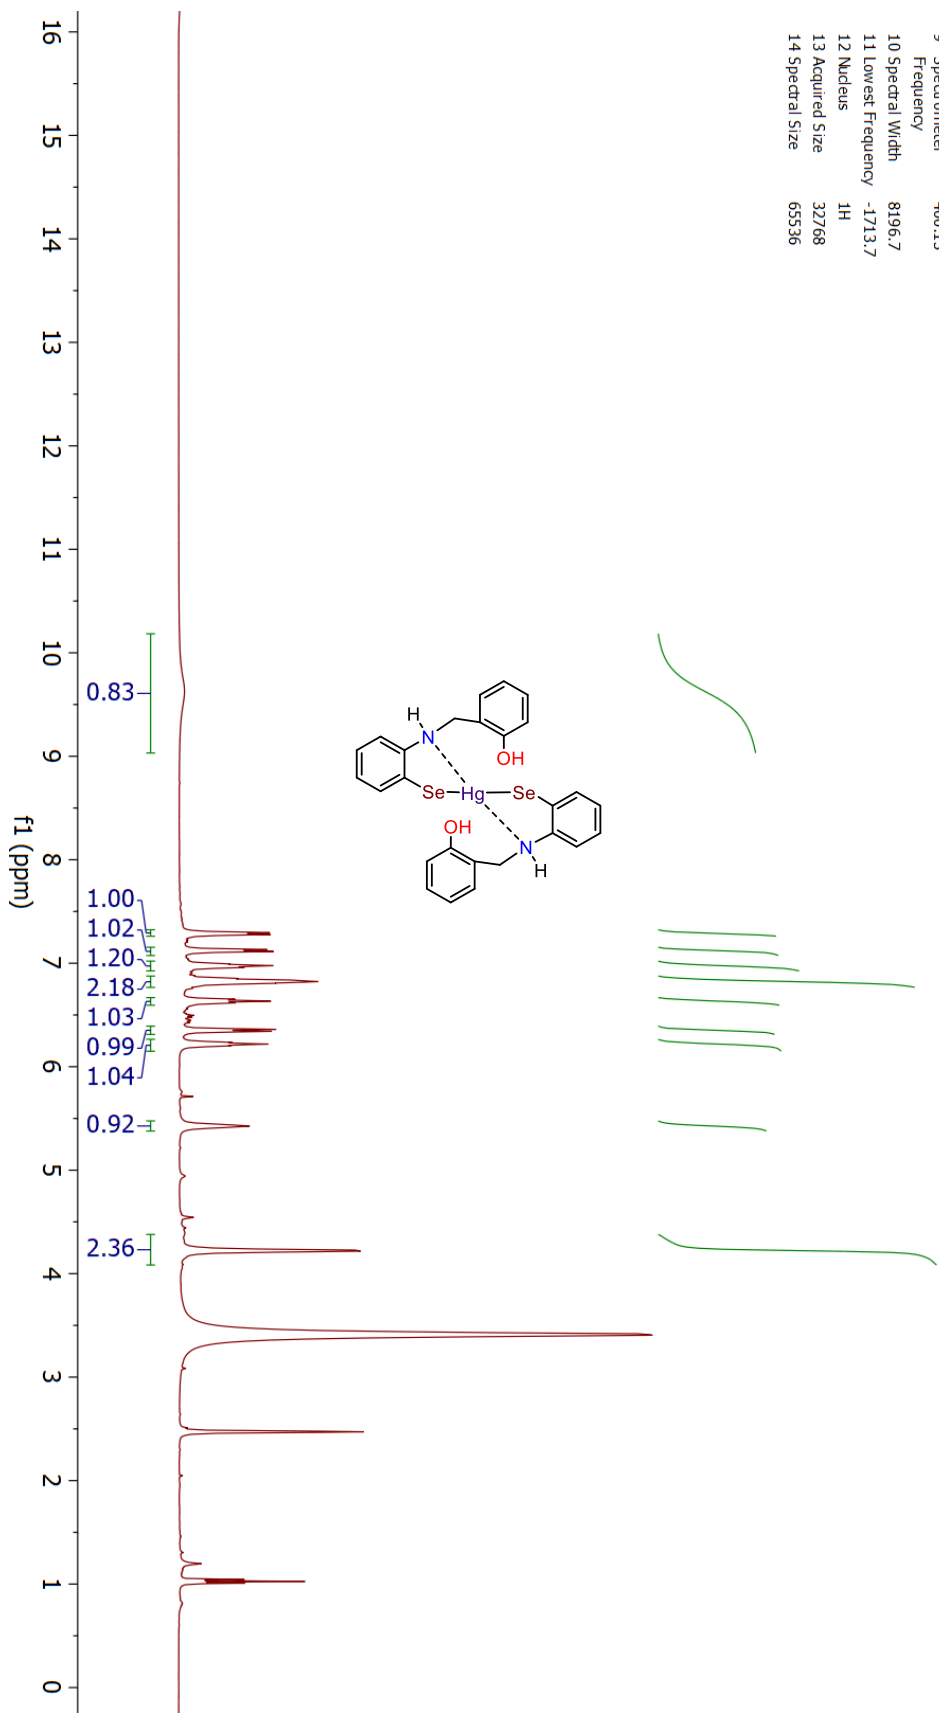

| Parameter           | Value               |
|---------------------|---------------------|
| 1 Origin            | Bruker Biospin GmbH |
| 2 Owner             | nmr-su              |
| 3 Solvent           | DMSO                |
| 4 Temperature       | 298.1               |
| 5 Pulse Sequence    | zg30                |
| 6 Number of Scans   | 16                  |
| 7 Acquisition Date  | 2017-01-20T10:05:04 |
| 8 Modification Date | 2017-01-20T10:05:04 |
| 9 Spectrometer      | 400.13              |
| Frequency           |                     |
| 10 Spectral Width   | 8196.7              |
| 11 Lowest Frequency | -1713.7             |
| 12 Nucleus          | <sup>1</sup> H      |
| 13 Acquired Size    | 32768               |
| 14 Spectral Size    | 65536               |



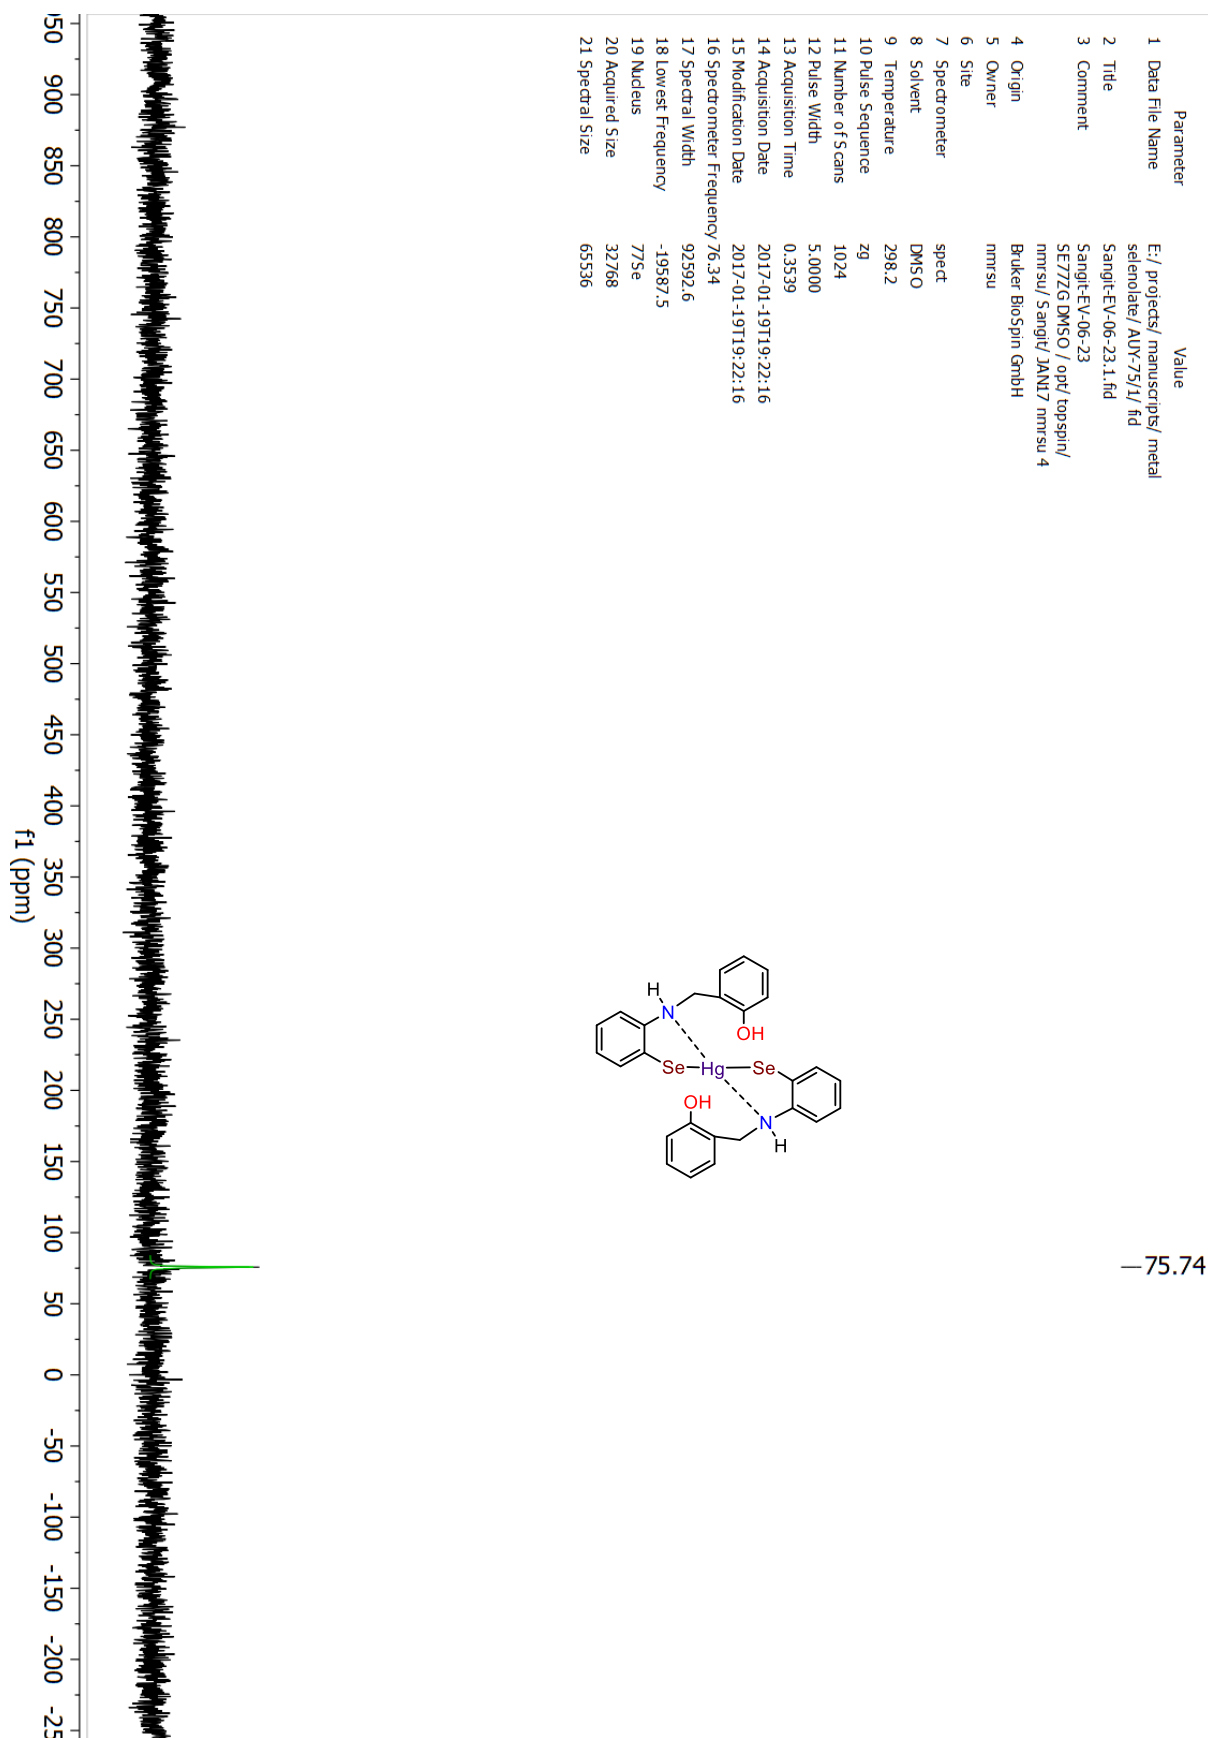

### Display Report

|                      |                                                                  |                  |                      |
|----------------------|------------------------------------------------------------------|------------------|----------------------|
| <b>Analysis Info</b> |                                                                  | Acquisition Date | 1/10/2019 3:16:42 PM |
| Analysis Name        | D:\Data\NEW USER DATA 2017\2019\JAN\10 jan\Prof.S.Kumar-AUY-75.d | Operator         | RUCHI                |
| Method               | tune_wide_APCI_23.06.m                                           | Instrument       | micrOTOF-Q II 10330  |
| Sample Name          | AUY-75                                                           |                  |                      |
| Comment              |                                                                  |                  |                      |

|                              |            |                       |           |                  |           |
|------------------------------|------------|-----------------------|-----------|------------------|-----------|
| <b>Acquisition Parameter</b> |            |                       |           |                  |           |
| Source Type                  | APCI       | Ion Polarity          | Positive  | Set Nebulizer    | 2.5 Bar   |
| Focus                        | Not active | Set Capillary         | 4000 V    | Set Dry Heater   | 200 °C    |
| Scan Begin                   | 50 m/z     | Set End Plate Offset  | -500 V    | Set Dry Gas      | 4.0 l/min |
| Scan End                     | 3000 m/z   | Set Collision Cell RF | 600.0 Vpp | Set Divert Valve | Waste     |

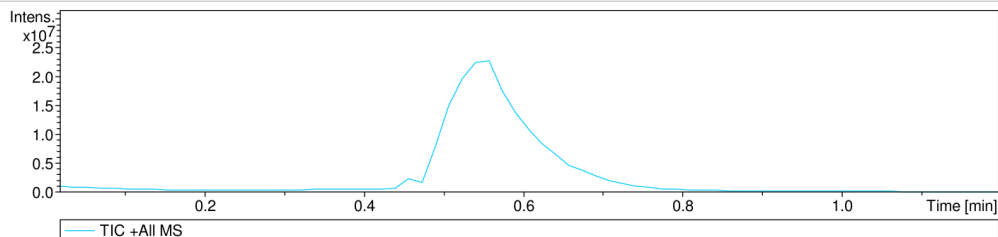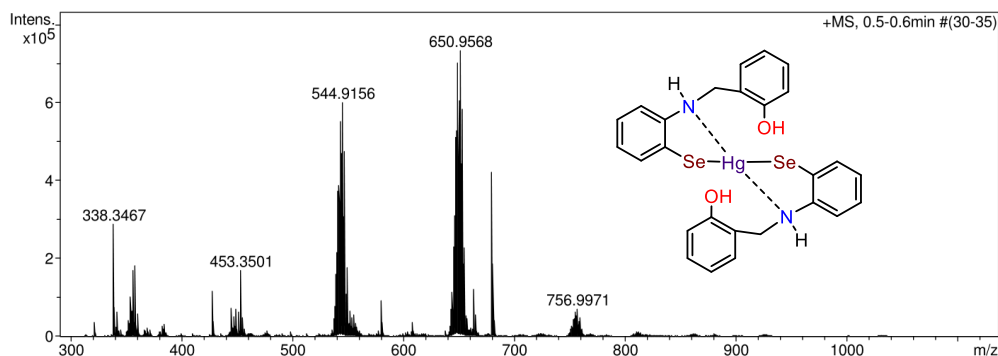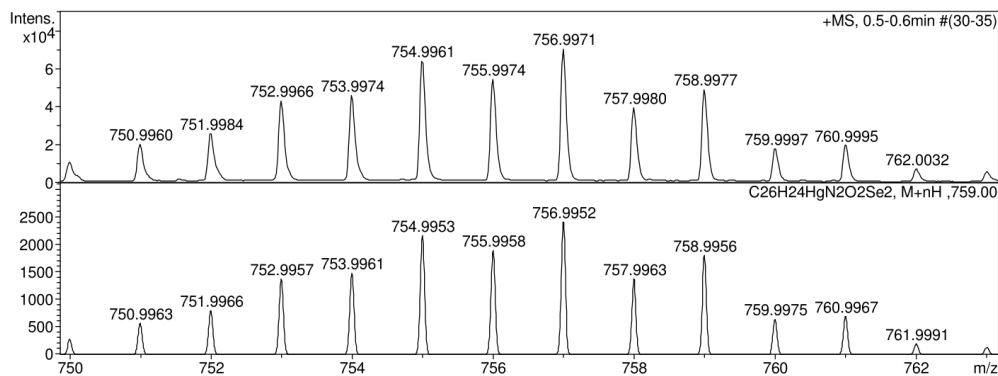

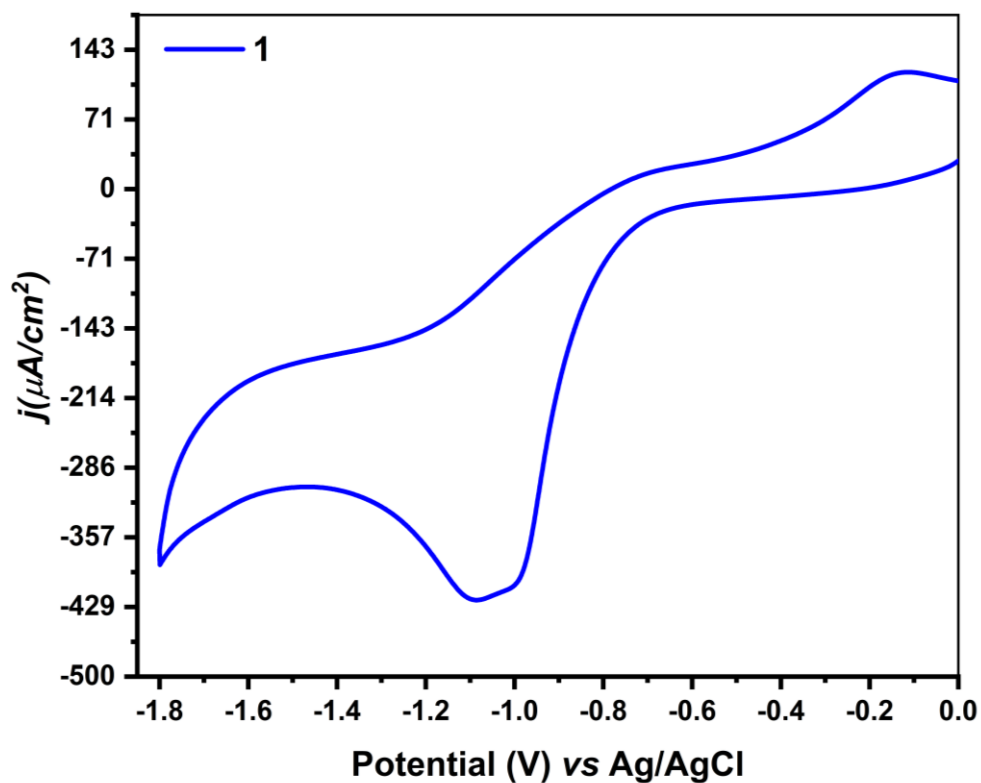

**Figure S1.** Cyclic voltammogram (CV) of zinc selenolate **1** (1mM) in acetonitrile solvent under cathodic potential at 0.1V/s scan rate using 0.1 M  $t\text{Bu}_4\text{NPF}_6$  supporting electrolyte.

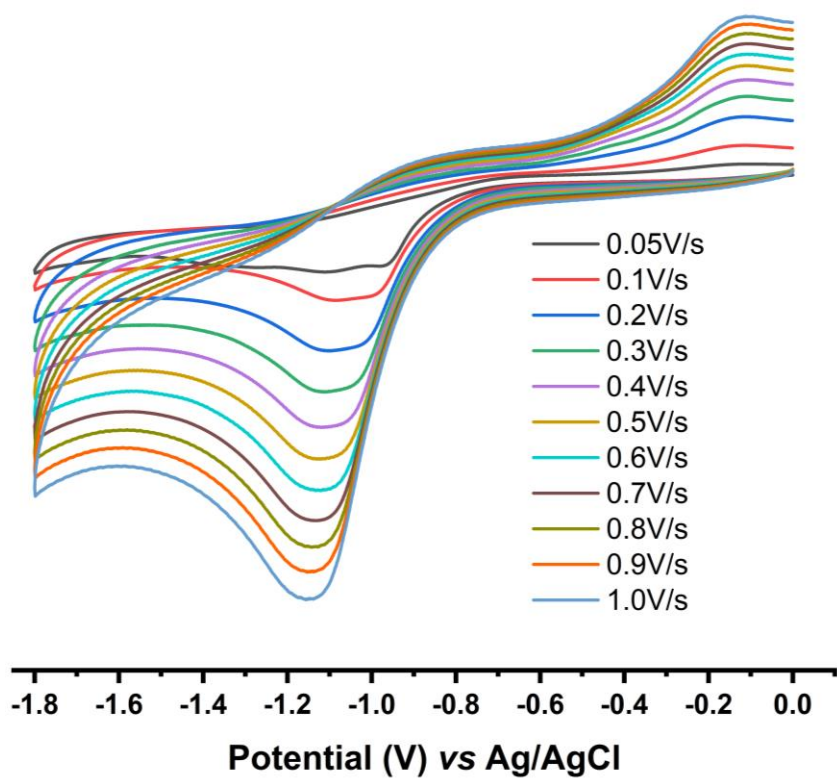

**Figure S2.** CV of bimetallic zinc selenolate **1** at various scan rate in acetonitrile.

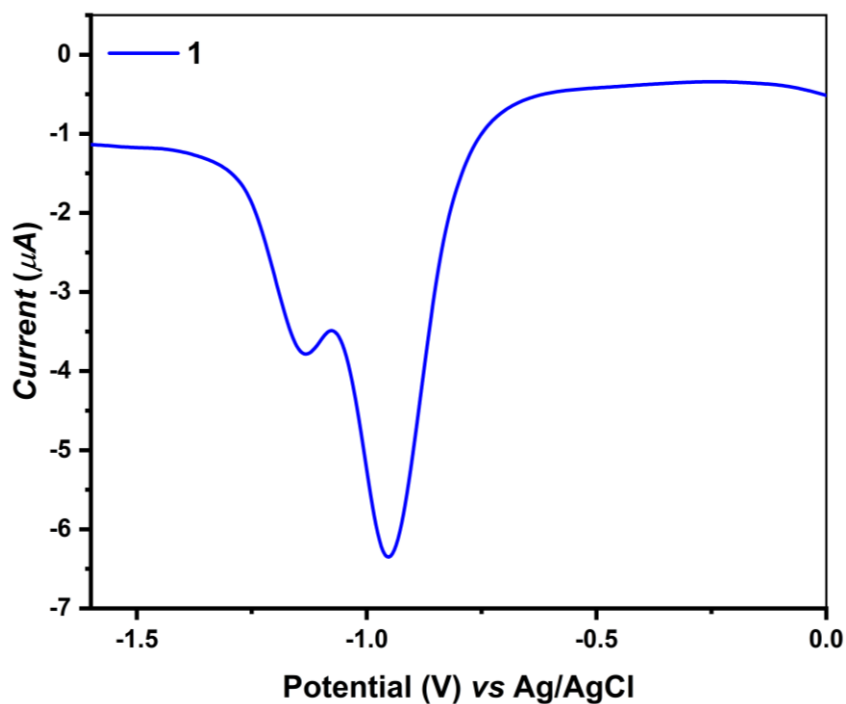

**Figure S3.** Differential Pulse Voltammetry graph of bimetallic zinc selenolate in acetonitrile. These graphs confirm the two-electron transfer in the zinc selenolate electrocatalyst under cathodic potential.

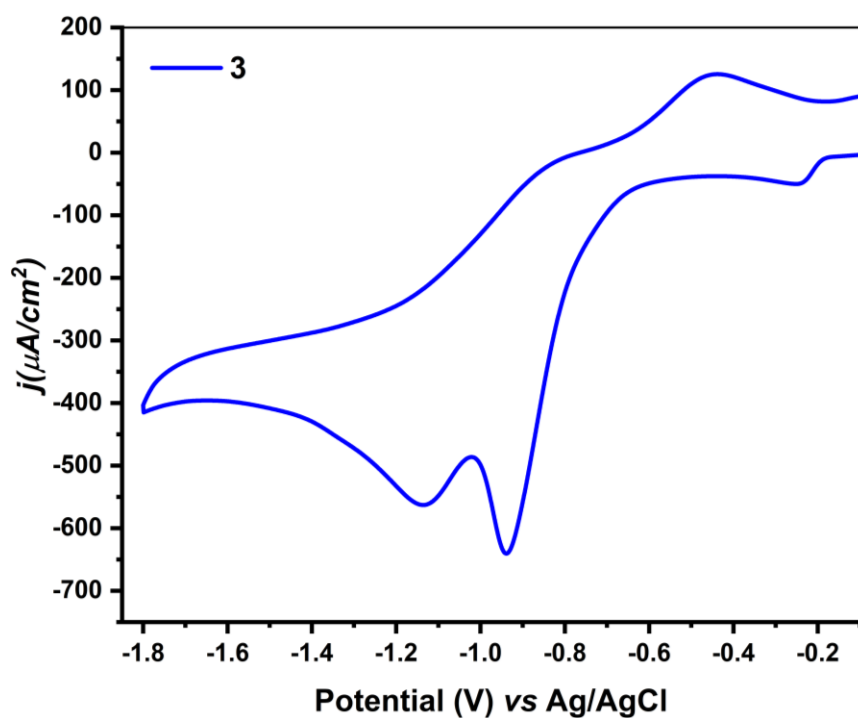

**Figure S4.** CV characterization of diselenide ligand **3** (1mM) in acetonitrile solvent using 0.1M  $n\text{Bu}_4\text{NPF}_6$  as supporting electrolyte.

### CV of zinc selenolate 1 at different scan rate in methanol

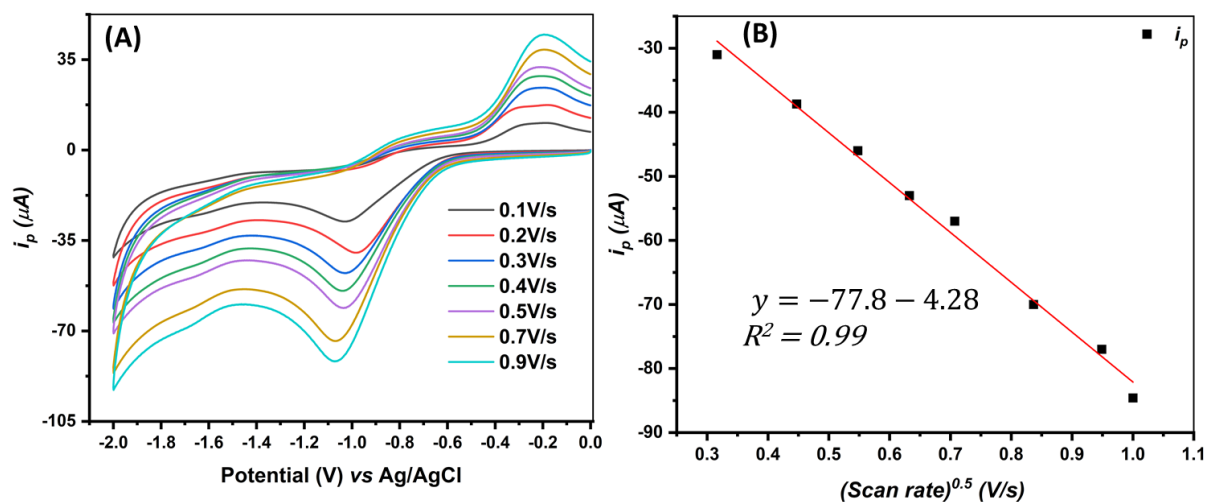

**Figure S5 A-B.** (A) Cyclic Voltammogram of bimetallic zinc selenolate **1** (1mM) using 0.1M  $n\text{Bu}_4\text{NPF}_6$  as supporting electrolyte in methanol solution at varying scan rates. (B) Corresponding linear plot (for HER) of  $i_p$  vs  $v^{0.5}$ .

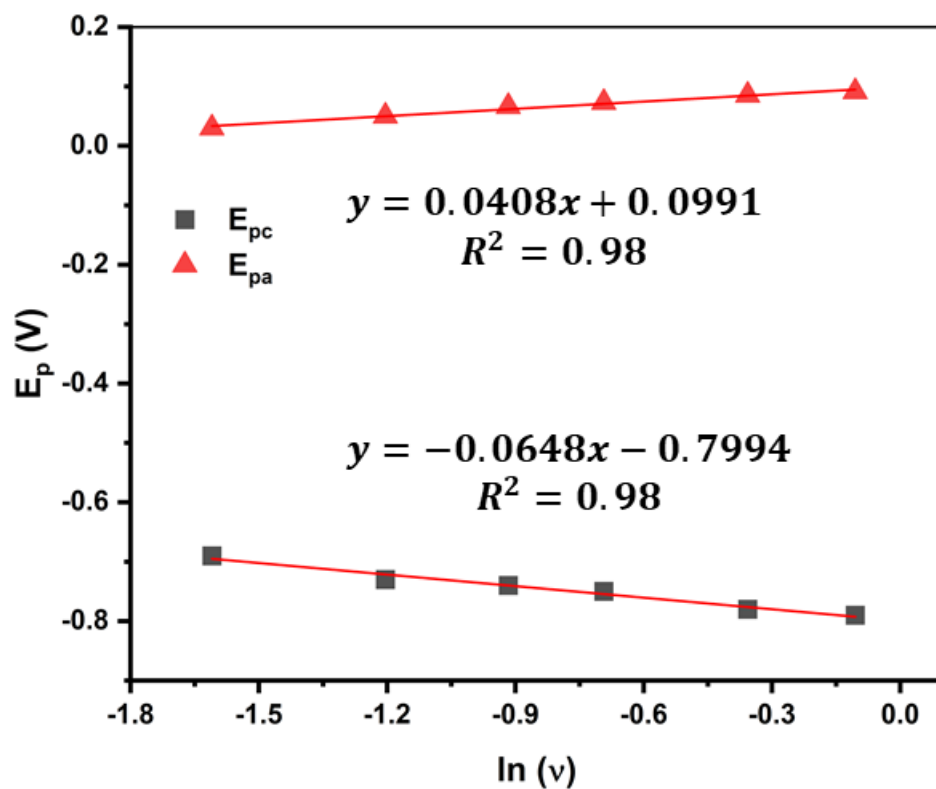

**Figure S6.** Plot of peak potential ( $E_p$ ) vs  $\ln(v)$  for bimetallic zinc selenolate **1** in methanol solvent at room temperature.



### CV of diselenide ligand **3** at different scan rate in methanol

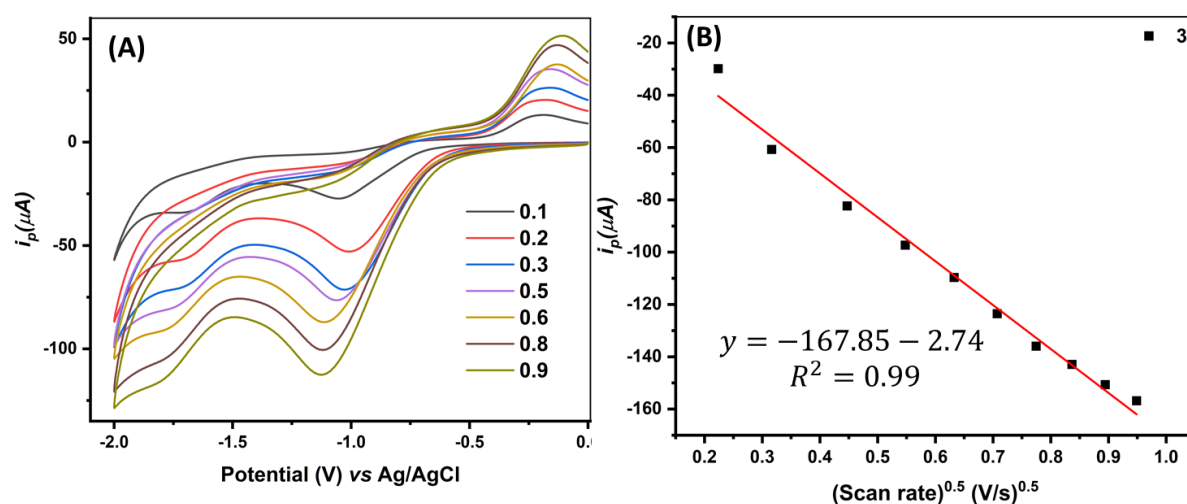

**Figure S7 A-B.** (A) Cyclic Voltammogram of diselenide ligand **3** (1mM) using 0.1M <sup>n</sup>Bu<sub>4</sub>NPF<sub>6</sub> as supporting electrolyte in methanol solution at varying scan rates from 0.1 V/s to 1.0 V/s. (B) Corresponding linear plot (for HER) of *i<sub>p</sub>* vs  $v^{0.5}$ .

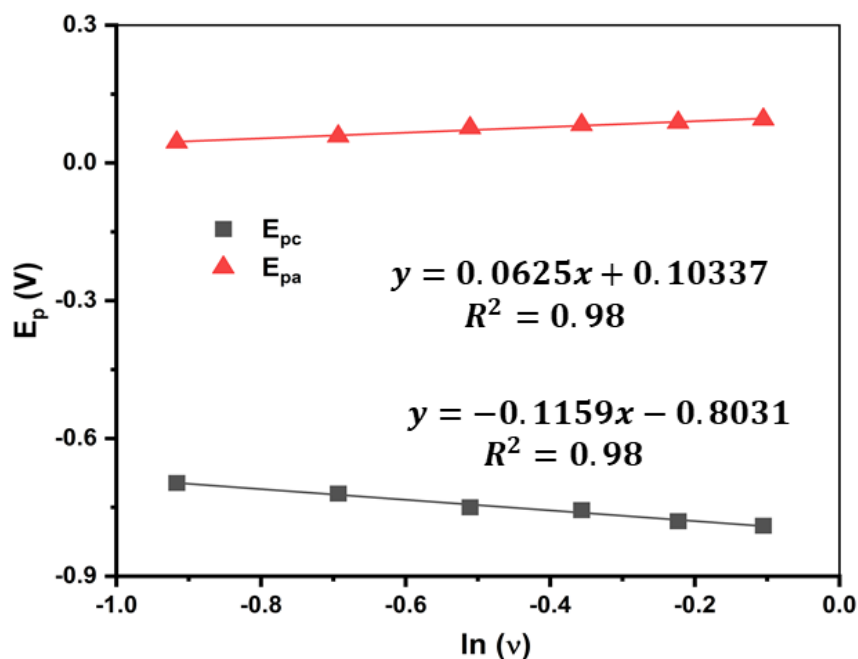

**Figure S8.** Plot of peak potential (*E<sub>p</sub>*) vs  $\ln(v)$  for diselenide ligand **3** in methanol solvent at room temperature.

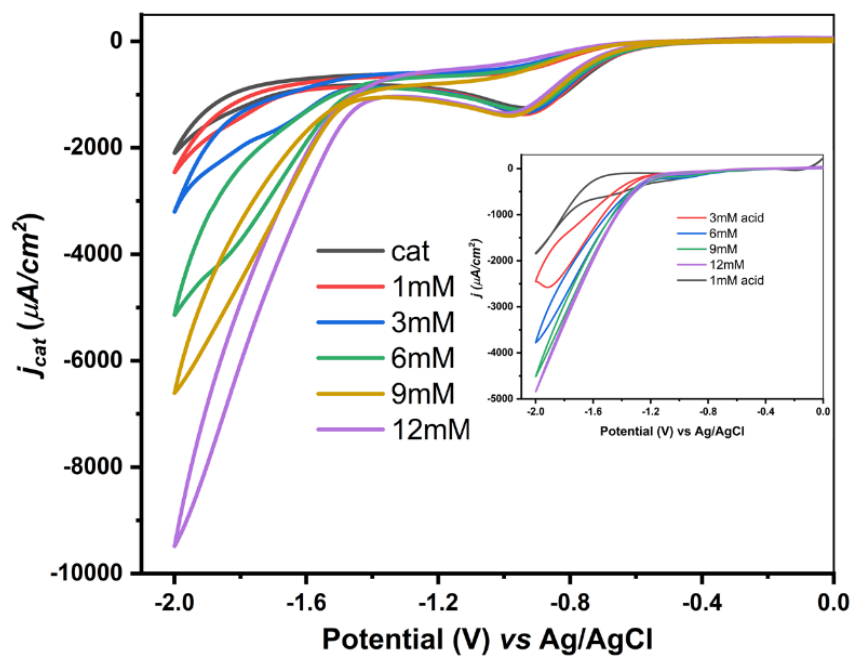

**Figure S9.** Electrochemical  $\text{H}_2$  evolution with the addition of acetic acid by catalyst **1** (1 mM) using  $n\text{Bu}_4\text{NPF}_6$  (0.1 M) as a supporting electrolyte in methanol solvent at 0.05V/s scan rate (HER in methanol without catalyst shown in the inset of the graph).

## Tafel Analysis of HER for zinc selenolate 1

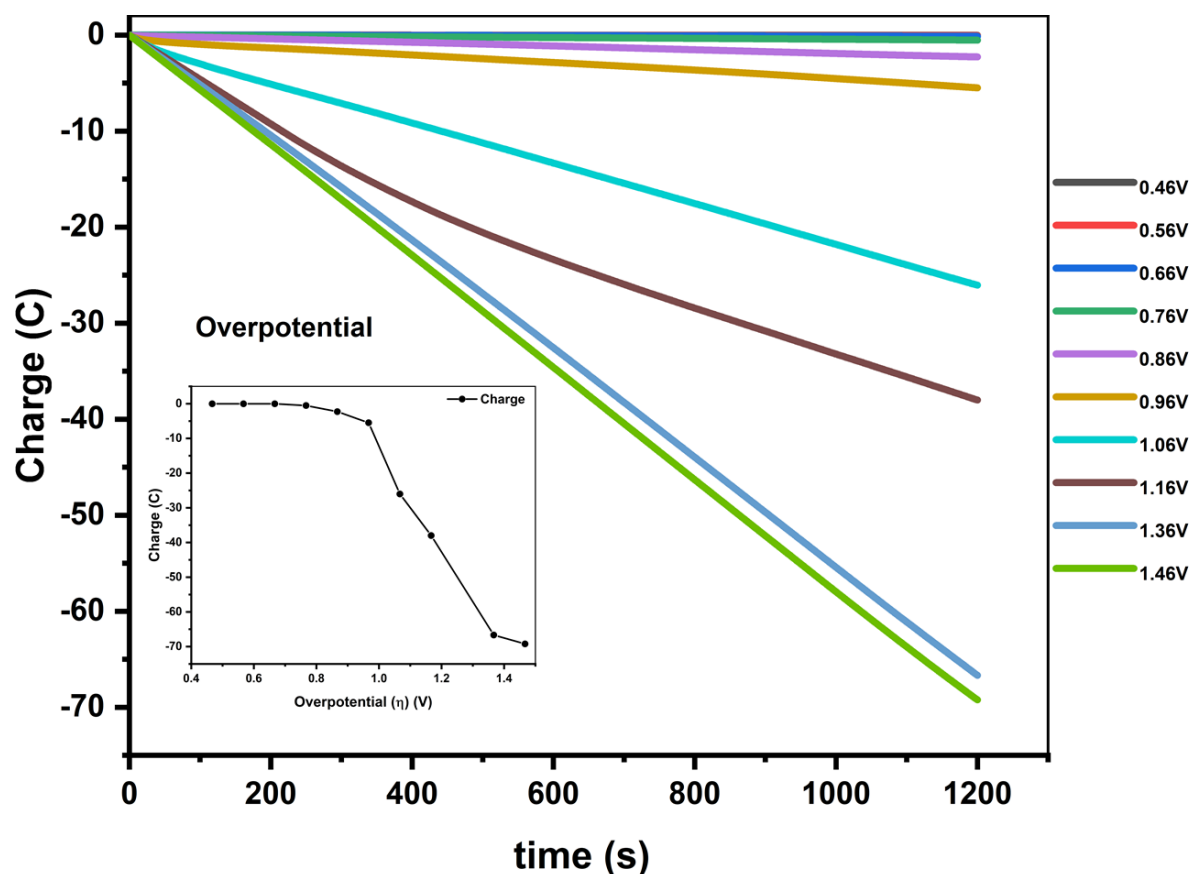

**Figure S10.** Tafel analysis for HER by zinc selenolate catalyst **1**. The actual overpotential of this complex was determined by controlled potential electrolysis at different potentials using mercury pool as the working electrode in methanol with acetic acid. The overpotentials were applied over a period of 1200 s and altered from 0.46 to 1.46 V *vs* Ag/AgCl. The total consumption of charge was negligible below 0.86 V *vs* Ag/AgCl, whereas at more negative potentials the charge increased linearly over time. Moreover, the charge *vs* overpotential plot (Figure S7 inset) clearly indicates the consumption of charge started increasing consistently after an overpotential of 0.86 V *vs* Ag/AgCl concomitant with the generation of bubbles. Therefore, the onset and actual overpotentials reside at close proximity.

## HER at different scan rate in methanol by zinc selenolate complex 1

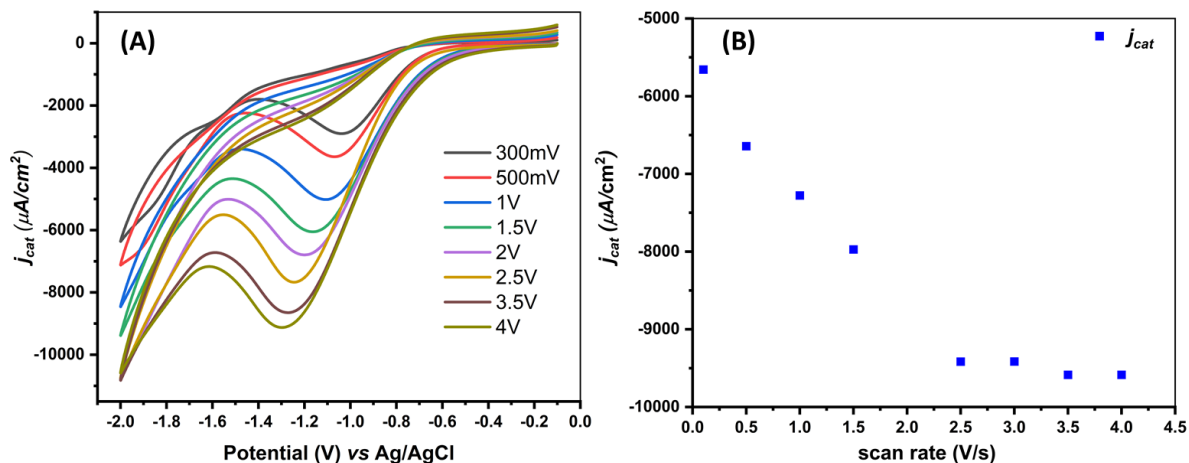

**Figure S11 A-B.** (A) Cyclic Voltammogram of bimetallic zinc selenolate **1** (1mM) using 0.1M  $n\text{Bu}_4\text{NPF}_6$  as supporting electrolyte in MeOH solution with varying the scan rate at 12mM acid concentration. (B) Corresponding linear plot for the  $j_{cat}$  ( $\mu\text{A}/\text{cm}^2$ ) vs scan rate (V/s)

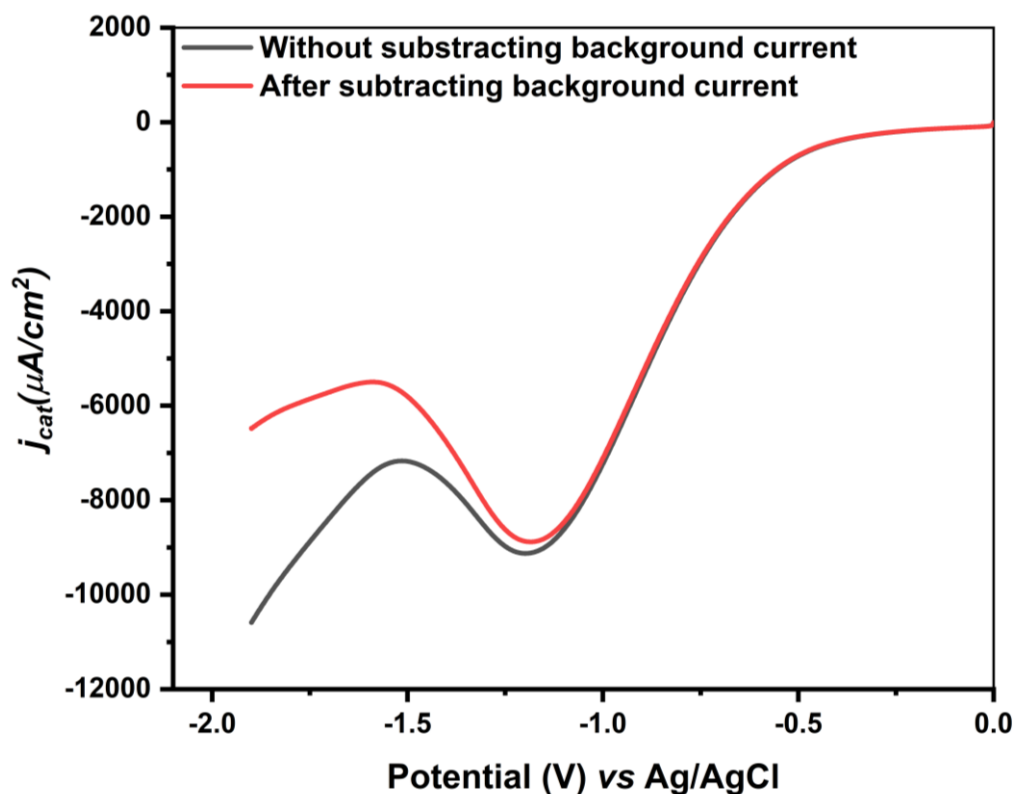

**Figure S11 C.** LSV of **1** (1mM) at under saturated acid concentration i.e., 12mM and saturated scan rate (2.0 V/s) with (Red line) and without (Black line) subtracting the background current.

### CV of 1 at various concentration in MeOH

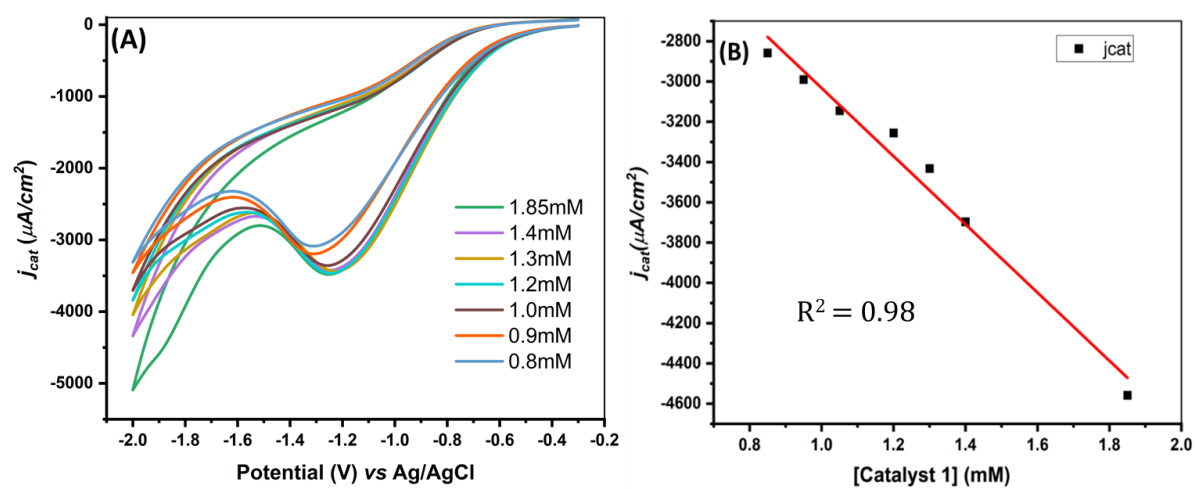

**Figure S12 A-B.** (A) CV of catalyst **1** at different concentration (0.1 M  $n\text{Bu}_4\text{NPF}_6$ ) in the presence of 12mM acetic acid concentration under cathodic direction. (B)  $j_{cat}$  vs [catalyst **1**] graph under cathodic direction at 0.5 V/s.

CV of diselenide ligand 3 at various acid concentration in MeOH

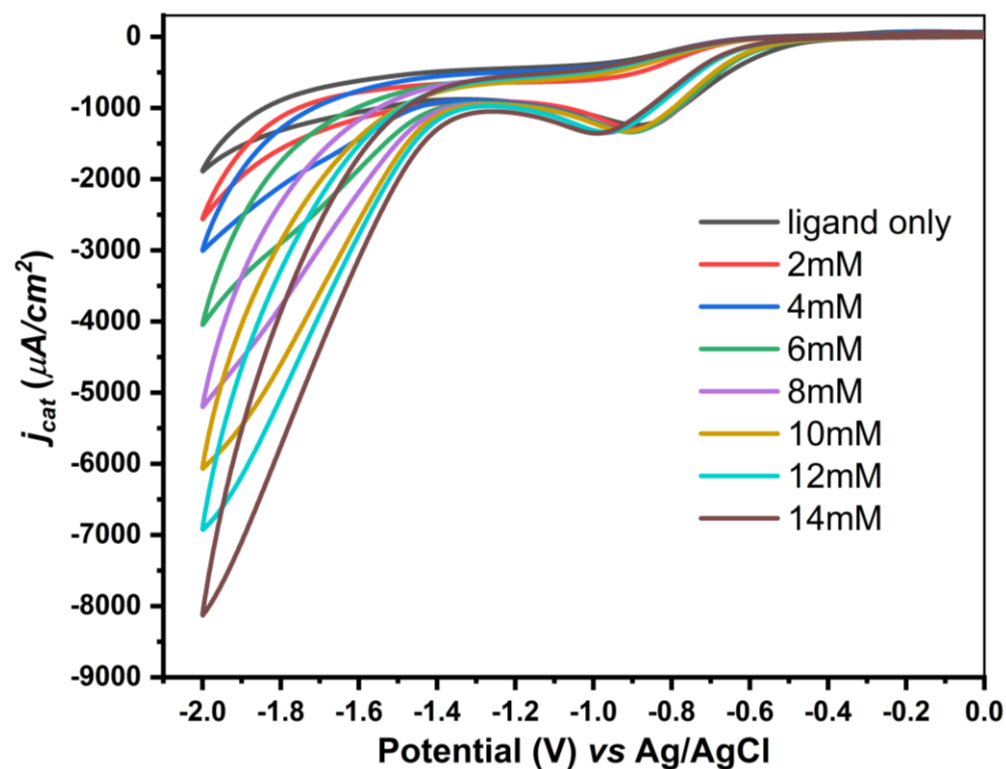

**Figure S13.** CV graph for the HER by diselenide ligand 3 at 0.05 V/s scan rate in various concentration of acetic acid in methanol solvent ( $n\text{Bu}_4\text{NPF}_6$  as a supporting electrolyte).

### HER at different scan rate in methanol by diselenide ligand 3

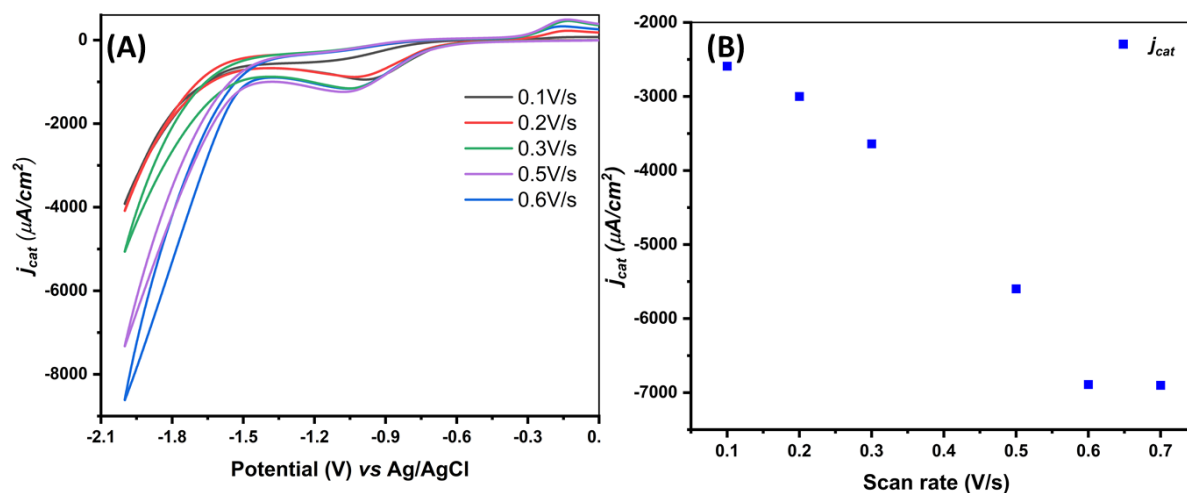

**Figure S14 A-B.** (A) Cyclic Voltammogram of aminophenolic diselenide ligand **3** (1mM) at 14mM acetic acid concentration using 0.1M  $n\text{Bu}_4\text{NPF}_6$  as supporting electrolyte in MeOH solution with varying the scan rate. (B) Corresponding linear plot for the  $j_{cat}$  ( $\mu\text{A}/\text{cm}^2$ ) vs scan rate (V/s) for the **1** (1mM) and 14mM acid concentration.

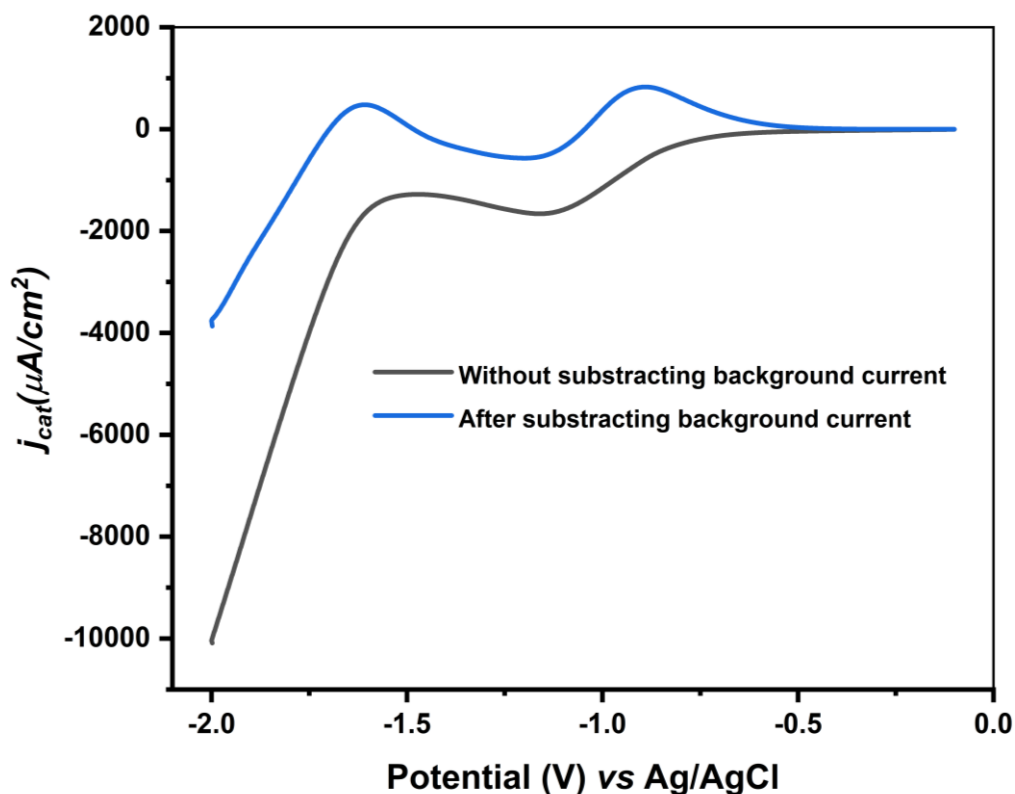

**Figure S14 C.** LSV of **3** (1mM) at under saturated acid concentration i.e., 14mM and saturated scan rate (0.6 V/s) with (Blue line) and without (Black line) subtracting the background current.

## CV of ZnCl<sub>2</sub>

The CV study of ZnCl<sub>2</sub> was done in ethanol due to the insolubility of ZnCl<sub>2</sub> in propylene carbonate.

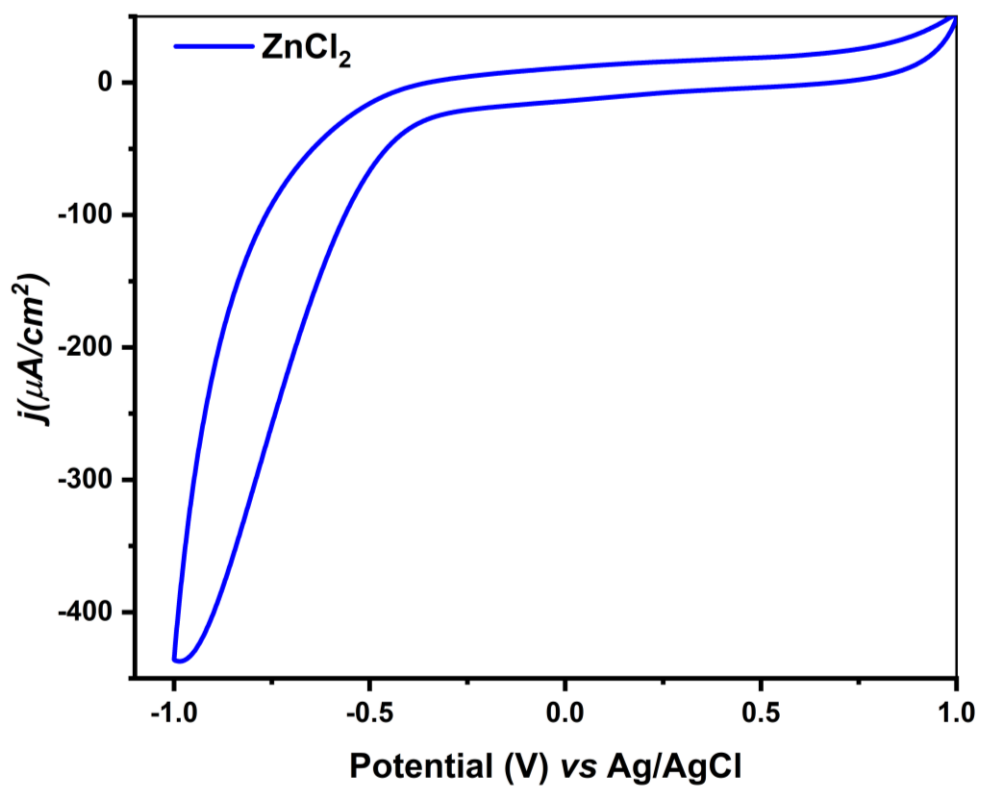

**Figure S15.** Cyclic Voltammogram of ZnCl<sub>2</sub> (1mM) in ethanol solution using <sup>n</sup>Bu<sub>4</sub>NPF<sub>6</sub>, as ZnCl<sub>2</sub> is not soluble in propylene carbonate.



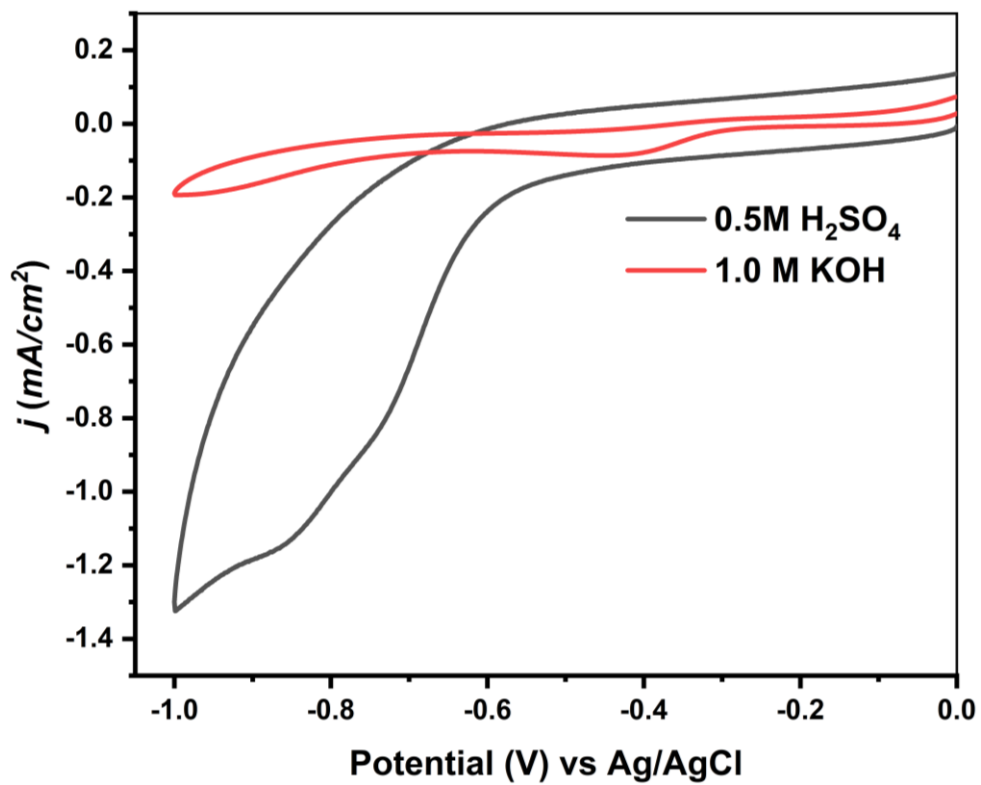

**Figure S16.** Current density comparison for the HER in 0.5 M H<sub>2</sub>SO<sub>4</sub> (Black line) and 1.0M KOH (Red Line) under heterogeneous condition.

## Constant Potential Electrolysis

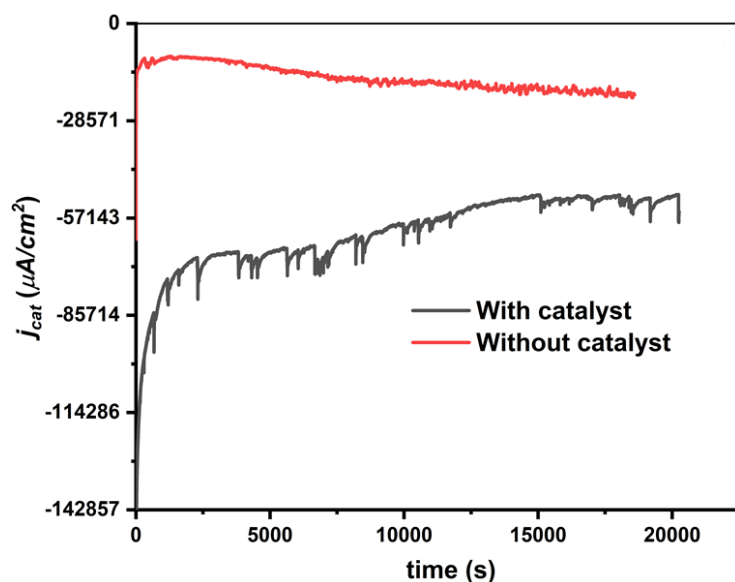

**Figures S17.** Constant potential electrolysis for HER at -1.78 V vs Ag/AgCl of catalyst **1** (5mM) in methanol using 0.1M  $n\text{Bu}_4\text{NPF}_6$  as supporting electrolyte. The spikes in currents are due to the formation of hydrogen gas bubbles.

## Post electrolysis analysis

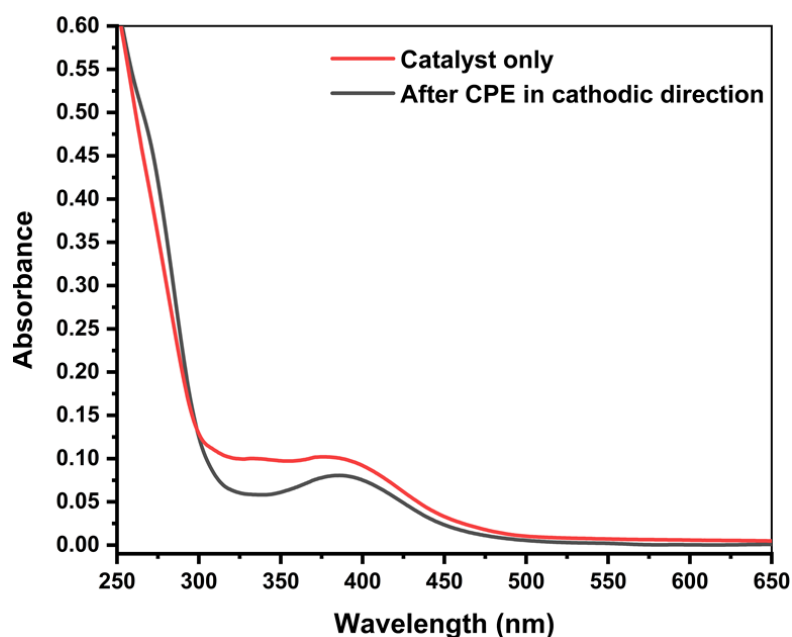

**Figure S18.** UV-Visible spectra of the reaction mixture after CPE under cathodic potential in methanol solvent, using 1mM zinc selenolate catalyst **1** and  $n\text{Bu}_4\text{NPF}_6$  (0.1 M) as a supporting electrolyte.

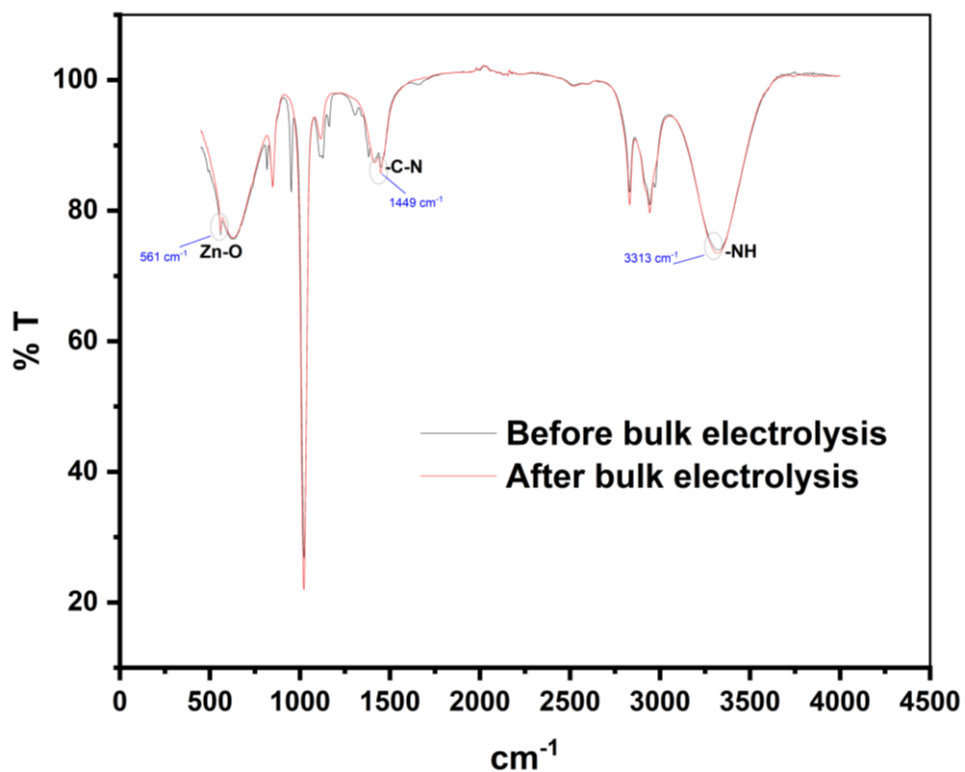

**Figure S19.** IR spectra of **1** before (upper one) and after (lower one) the bulk electrolysis solution in methanol containing 12mM acid at -1.78 V vs Ag/AgCl under cathodic potential.

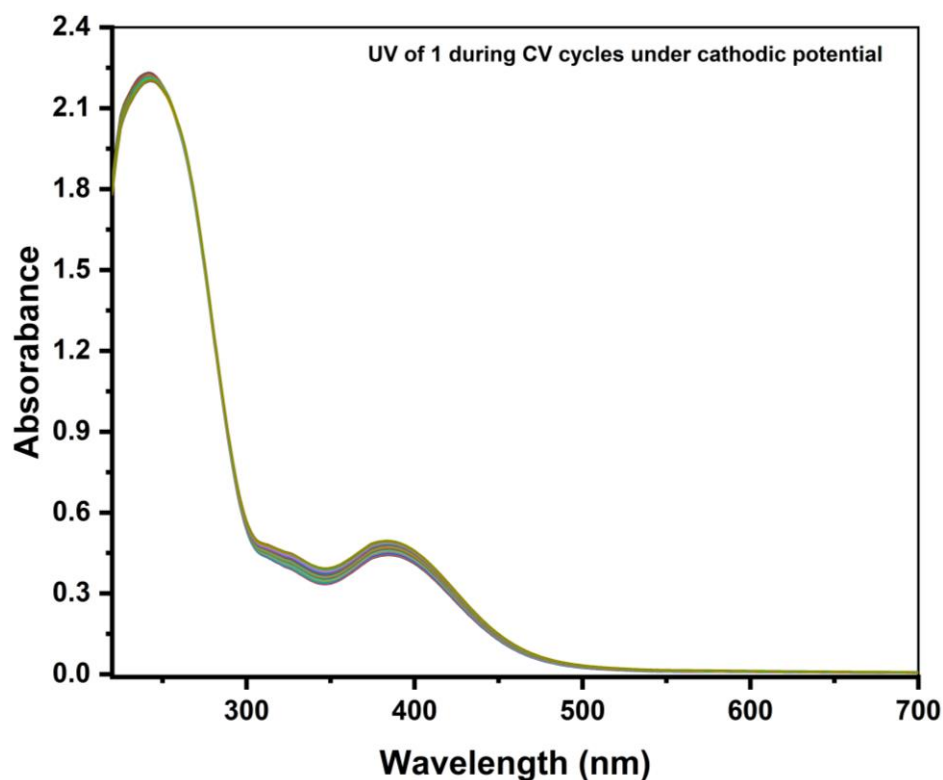

**Figure S20.** UV of **1** during continuous CV cycles under cathodic potential in the presence of 12mM acetic acid concentration using 0.1M  $n\text{Bu}_4\text{NPF}_6$  as a supporting electrolyte in methanol solvent.

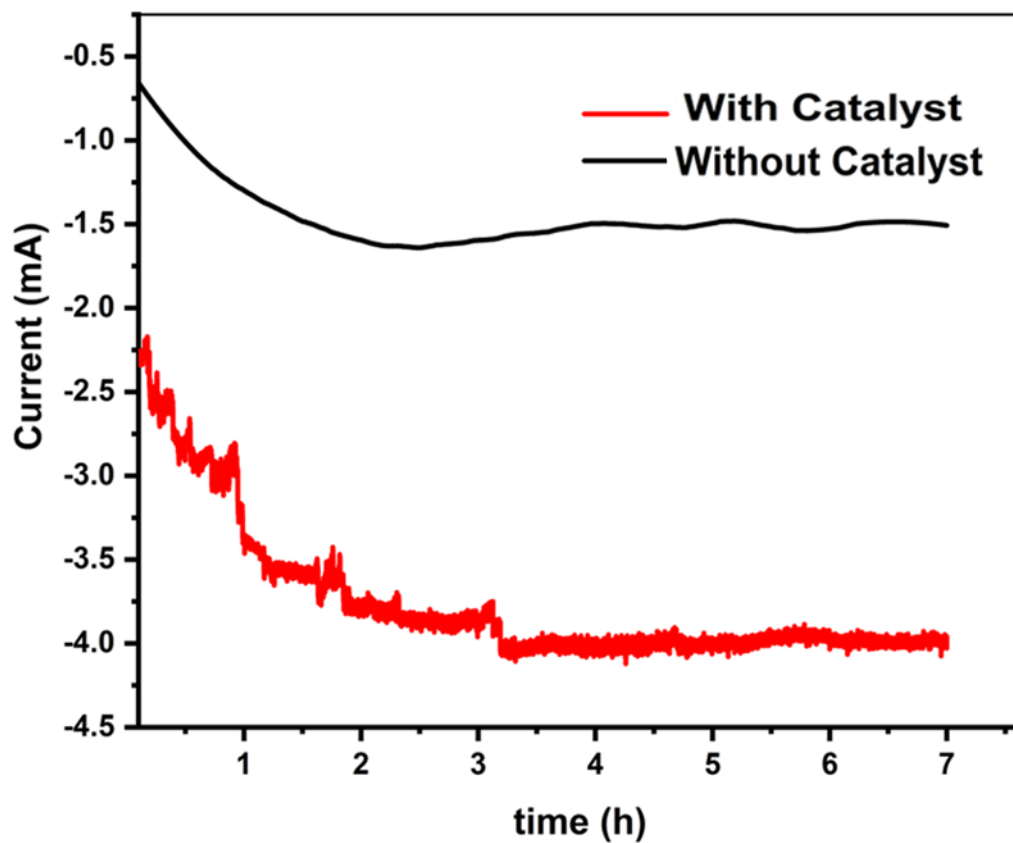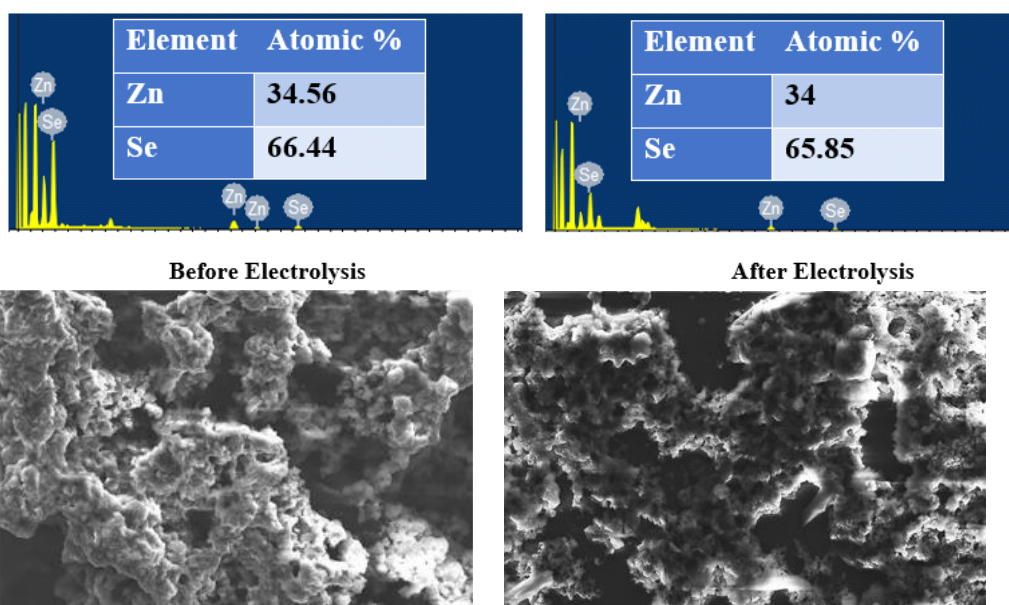

**Figure S21.** CPE study of the catalysis under heterogenous condition at GC electrode at  $-0.96$  V vs Ag/AgCl (Upper). EDX study and SEM image of the electrode surface before and after bulk electrolysis under anodic potential (Below).

## Hydrogen-quantification and Faradic efficiency

In order to obtain experimental evidence that the evolved gas in the reduction of proton to hydrogen, we carried out the following dual reactions. The electrocatalysis reaction using the catalyst **1** was conducted in a gastight electrochemical cell through a cannula tube to another flask in which styrene and a catalytic amount of  $\text{RhCl}(\text{PPh}_3)_3$  in benzene were placed. When the reaction was almost completed, ethylbenzene was produced in 15 % yield in the latter flask, demonstrating that the hydrogen gas generated in the former flask was transferred through the cannula tube to reduce styrene in the latter flask.

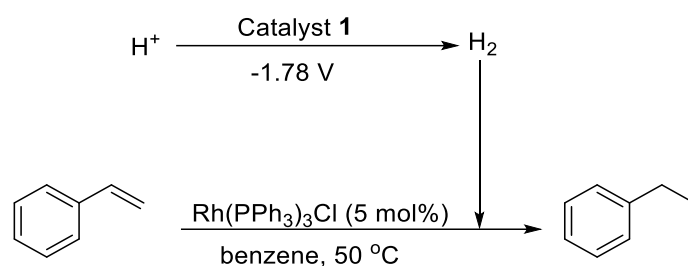

**Scheme S2.** Schematic representation of dual reaction.

Moles of ethylbenzene produced =  $15 \times 10^{-3}$  mmoles

Amount of hydrogen gas needed to reduced 1 mole of styrene = 1 mole  $\text{H}_2$

Therefore, generated hydrogen during electrocatalysis = 15  $\mu$ moles

Total charge developed during electrolysis = 3.86 C

Faradic efficiency = 75 %

**For Ligand:** Moles of ethylbenzene produced =  $4.41 \times 10^{-3}$  mmoles

Amount of hydrogen gas needed to reduced 1 mole of styrene = 1 mole  $\text{H}_2$

Therefore, generated hydrogen during electrocatalysis = 4.41  $\mu$ moles

Total charge developed during electrolysis = 2.96 C

Faradic efficiency = 28%

## Hydrogenation of Styrene

Hydrogenation reaction was performed at constant pressure. In a typical run, the Wilkinson catalyst  $\text{Rh}(\text{PPh}_3)_3\text{Cl}$  (0.005 mmol), styrene (0.1 mmol) and dodecane (0.03 mmol) were dissolved in benzene (1 mL) under a nitrogen atmosphere. The solution was then bubbled by hydrogen gas generated during water reduction. The temperature of the system was maintained at 50°C. After 12h, the reaction mixture was subjected to GC-MS analysis and showed quantitative conversion of styrene.

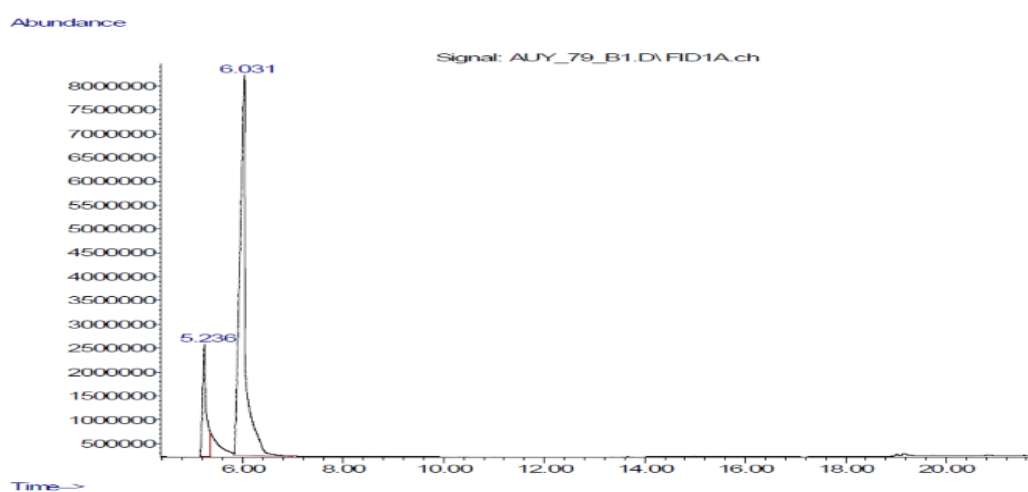

No peaks were detected using the method integration parameters!

Signal : AUY\_79\_B1.D\FID1A.ch

| peak # | R.T. min | Start min | End min | PK TY | peak height | corr. area | corr. % max | % of total |
|--------|----------|-----------|---------|-------|-------------|------------|-------------|------------|
| 1      | 5.236    | 5.145     | 5.345   | M     | 2350127     | 117230332  | 17.78%      | 15.093%    |
| 2      | 6.031    | 5.818     | 6.993   | M     | 8228674     | 659497797  | 100.00%     | 84.907%    |

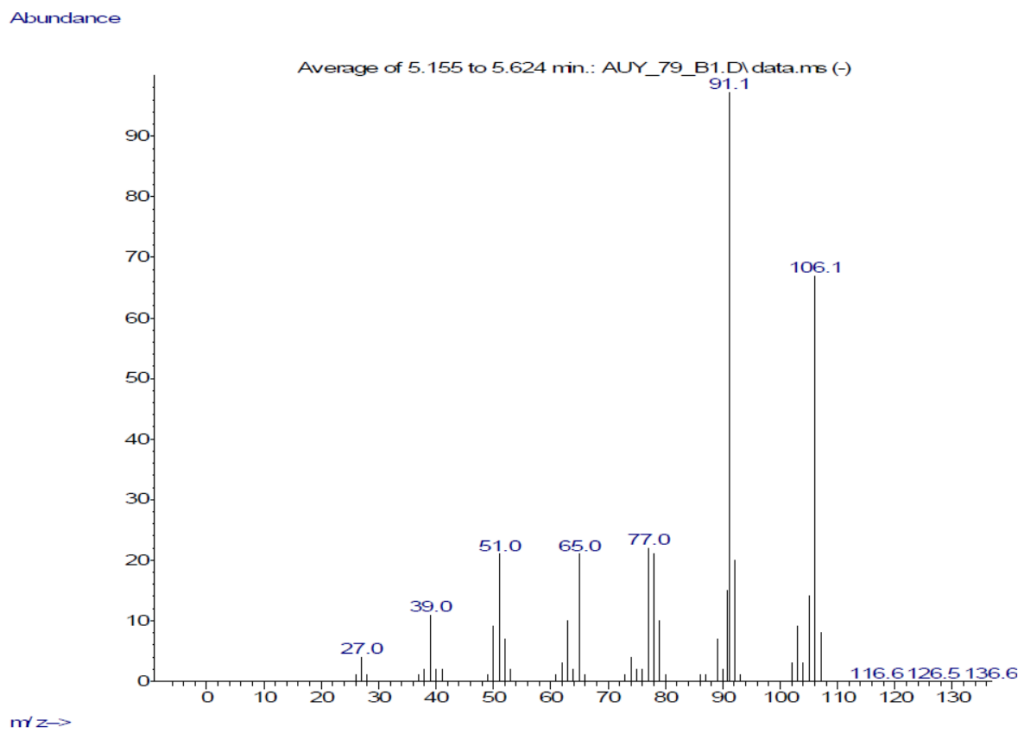

**Figure S22.** GC spectra of reaction mixture of styrene with hydrogen gas

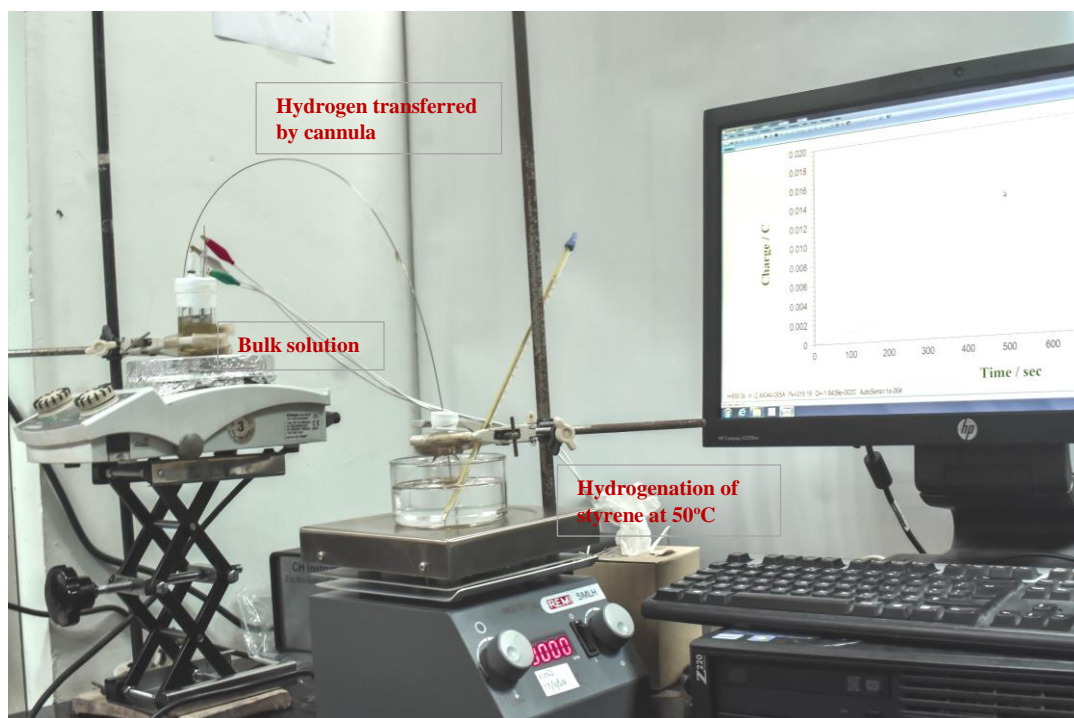

**Figure S23.** Reaction setup for the dual reaction.

## Qualitative estimation of evolved hydrogen by GC thermal detector

Sample Name : sks -ma-h2 pure1  
 Sample ID : 1.5ml  
 Sample Type : Unknown  
 Injection Volume :  
 ISTD Amount :  
 Data Name : D:\test\MA\08.06.2019\sks -ma-h2 pure1.gcd  
 Method Name : D:\test\MA\h2 and co2.gcm

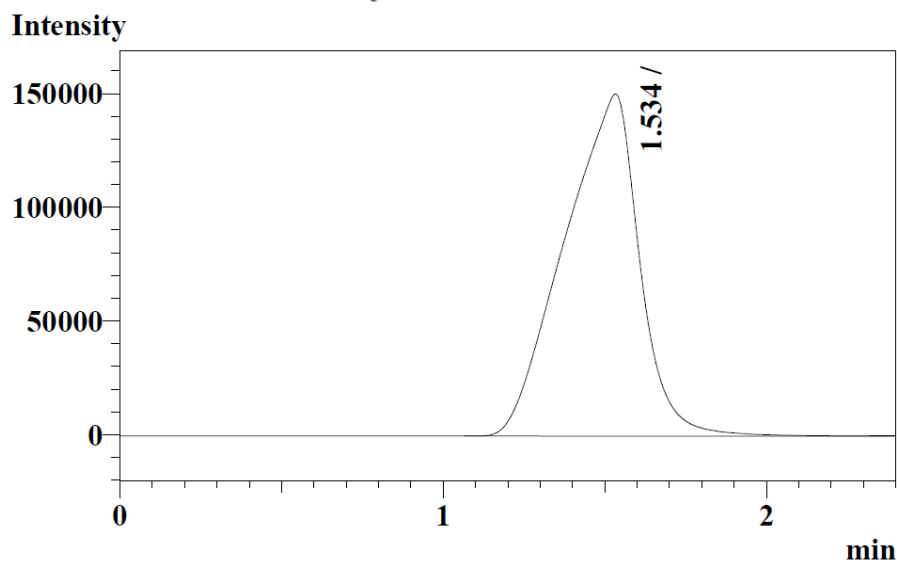

**Figure S24.** GC-TCD scan of pure hydrogen gas injected by Hamilton gas tight syringe.

User Name : Admm  
 Vial# : 1  
 Sample Name : sks-sk- ad-30 min  
 Sample ID : 50  
 Sample Type : Unknown  
 Injection Volume :  
 ISTD Amount :  
 Data Name : D:\test\ak\sks-sk- ad-30min.gcd  
 Method Name : D:\test\MA\h2 and co2.gcm

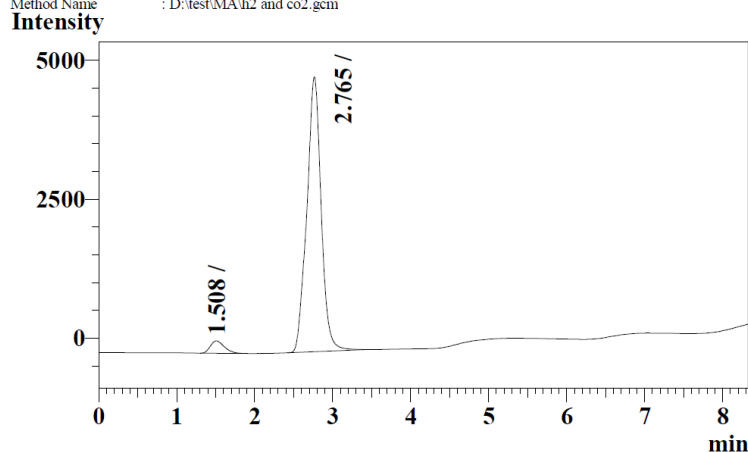

| Peak# | Ret.Time | Area  | Height | Conc.  | Unit | Mark | ID# | Cmpd Name |
|-------|----------|-------|--------|--------|------|------|-----|-----------|
| 1     | 1.508    | 2781  | 223    | 4.210  |      |      |     |           |
| 2     | 2.765    | 63282 | 4949   | 95.790 |      |      |     |           |
| Total |          | 66063 | 5172   |        |      |      |     |           |

**Figure S25.** GC-TCD scan of evolved hydrogen gas after 30min bulk electrolysis of acid reduction. Reaction Condition: Catalyst **1** (3mM), acetic acid (12mM) in MeOH solvent using  $n\text{Bu}_4\text{NPF}_6$  (supporting electrolyte) at -1.78 V vs Ag/AgCl. electrolysis time= 30 minutes.



### Post Electrolysis Dip Test

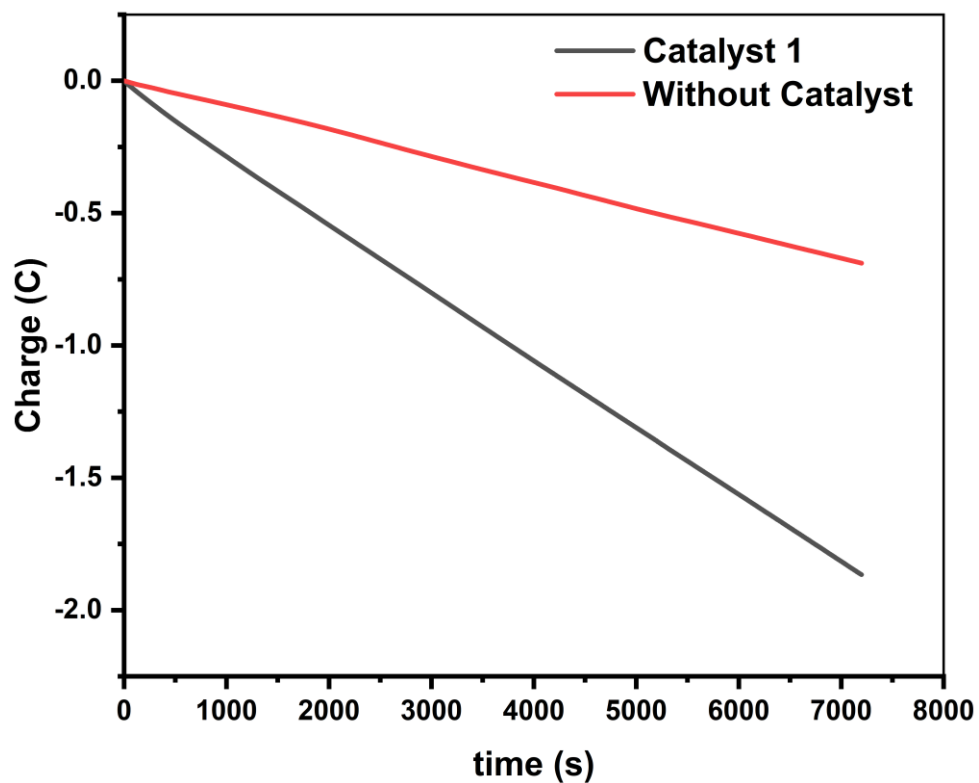

**Figure S26.** CPE for catalyst **1** (1mM),  $n\text{Bu}_4\text{NPF}_6$  (0.1M) in Methanol solvent with 12 mM acetic acid concentration at -1.85 V vs Ag/AgCl under cathodic potential. Black is with catalyst. Red is post run of black after rinse with deionized  $\text{H}_2\text{O}$ .

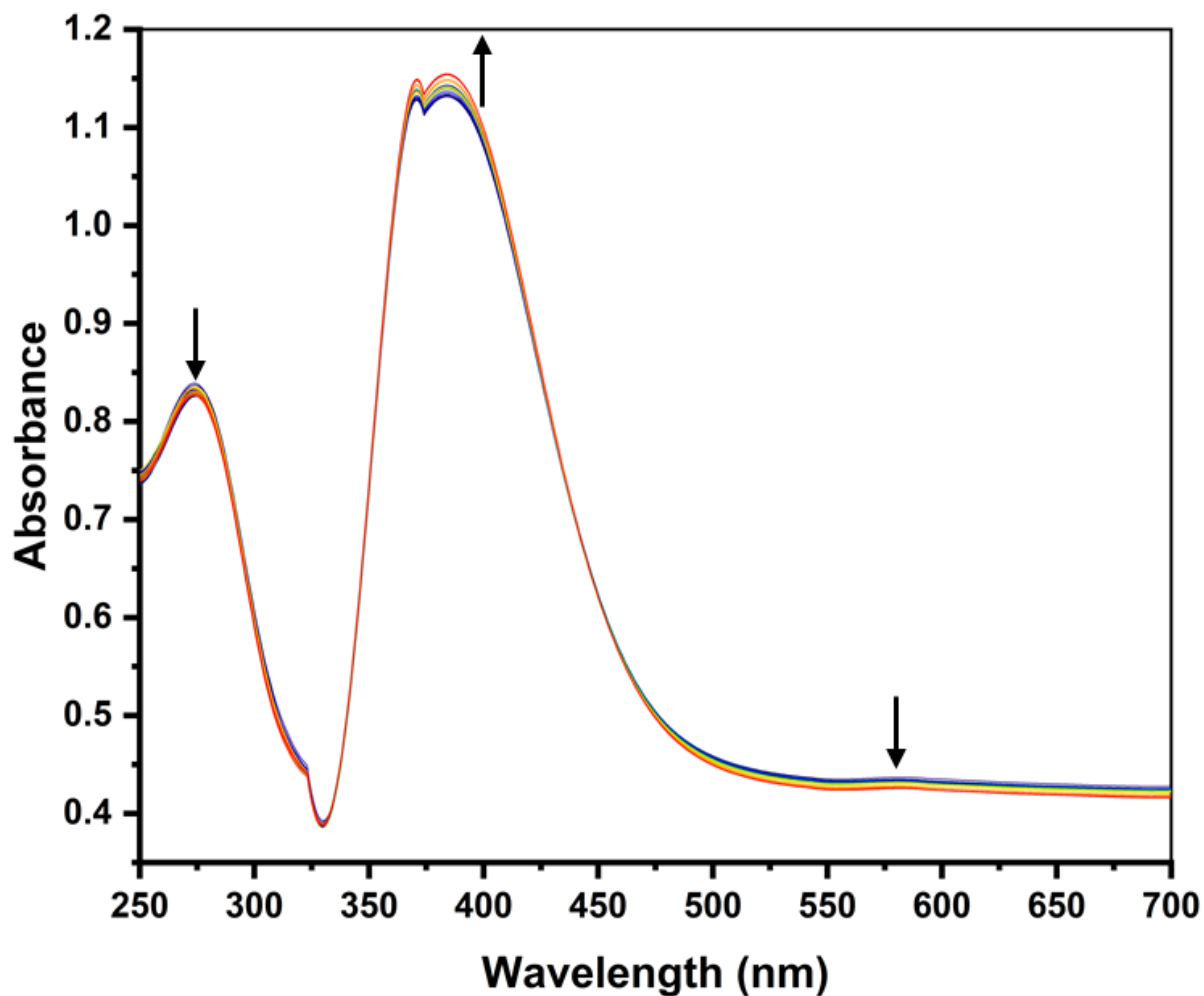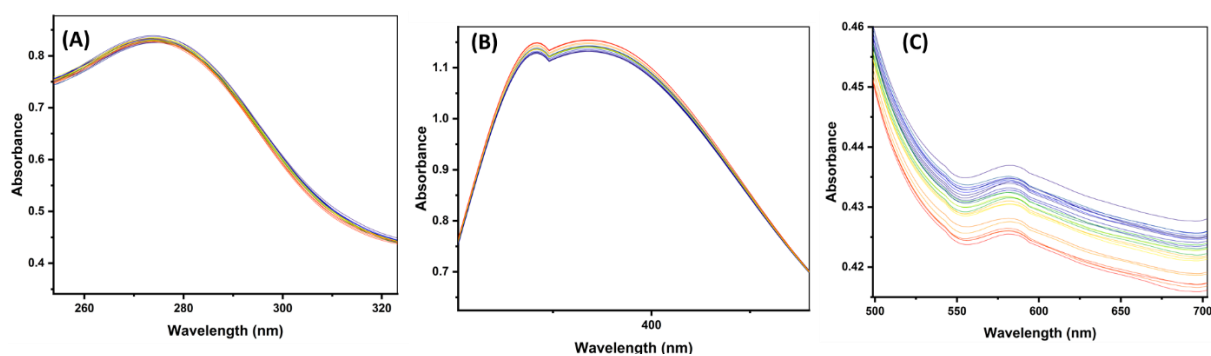

**Figure S27.** UV-visible spectra of zinc selenolate complex **1** from spectroelectrochemical electrolysis. UV spectra recorded during the electrolysis of 1 mM zinc selenolate catalyst **1** under applied potential of -1.85 V in 0.1 M  $n\text{Bu}_4\text{NPF}_6$  methanol solution. **Lower:** (A) and (C), Decrease in absorption bands at 274 and 585 nm. (B) Blow up in the region of 342nm – 440nm region showing isosbestic point at 447 nm and 336 nm.

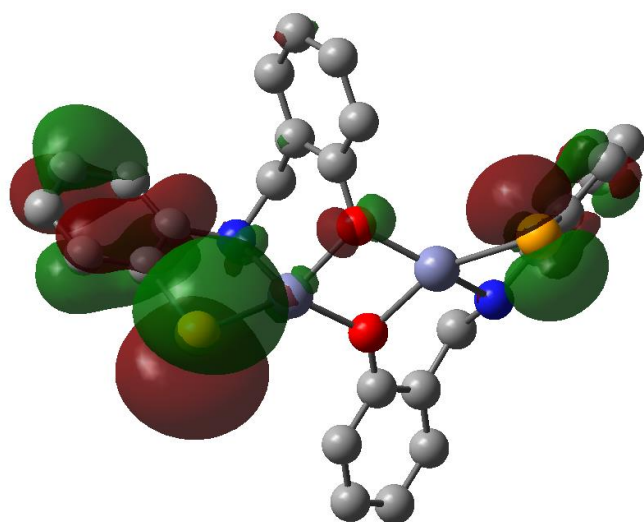

**Figure S28.** Highest occupied molecular orbital (HOMO) of bimetallic zinc selenolate **1**.

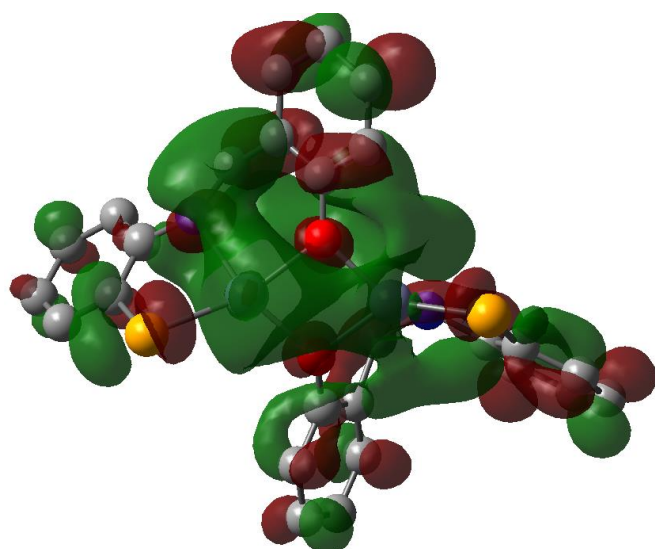

**Figure S29.** Lowest unoccupied molecular orbital (LUMO) of bimetallic zinc selenolate **1**.

Catalyst **1.2AcOH**: Calculated  $m/z = 803.8986$

Experimentally observed: 803.2558

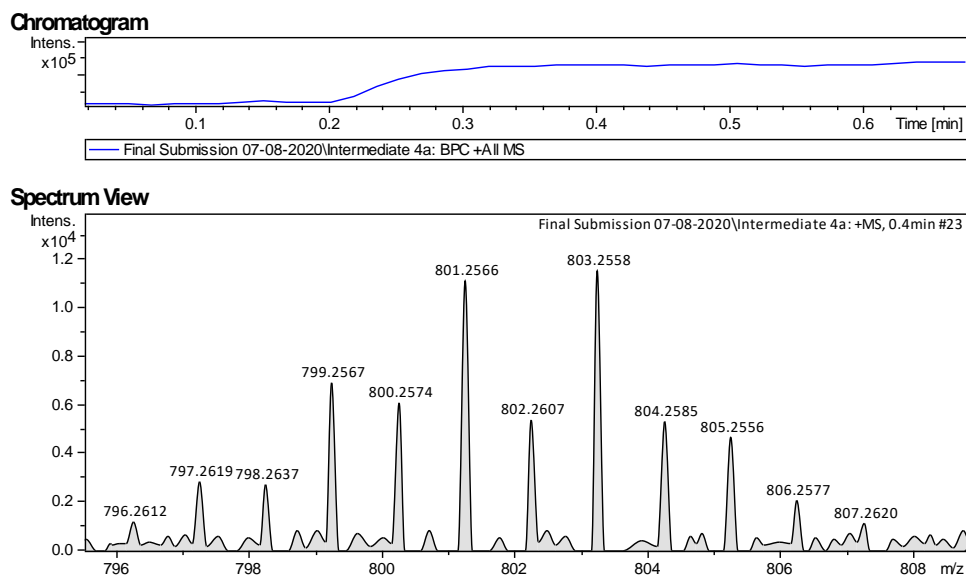

**Figure S30.** HRMS data of reaction mixture containing zinc selenolate **1** and acetic acid in methanol solvent.

### DFT Calculations

All computational were performed with the Gaussian 09 Revision A.02 program suite<sup>9</sup> with the DFT method of Becke's three parameter hybrid Hartree-Fock procedure with the Lee-Yang-Parr correlation function (B3LYP). The geometry optimization calculation of the bimetallic zinc selenolate complex **1** was fully optimized by DFT/B3LYP method with the 6-311G(d) basis set in gass phase.

**Table S1.** Cartesian coordinates of optimized structure of **1**.

| Symbol | X        | Y        | Z        |
|--------|----------|----------|----------|
| C      | -5.74082 | -1.31555 | 2.036952 |
| C      | -4.37681 | -1.07298 | 2.145671 |
| C      | -3.6926  | -0.35204 | 1.165943 |
| C      | -4.38624 | 0.153197 | 0.049429 |
| C      | -5.76335 | -0.09591 | -0.04202 |
| C      | -6.43373 | -0.82168 | 0.933515 |
| H      | -6.25487 | -1.88197 | 2.805994 |
| H      | -3.8395  | -1.44745 | 3.010338 |
| H      | -6.30803 | 0.285276 | -0.89869 |

|    |          |          |          |
|----|----------|----------|----------|
| H  | -7.49881 | -1.00309 | 0.8299   |
| C  | -1.38725 | -1.18205 | 1.813778 |
| H  | -0.40663 | -0.71474 | 1.950581 |
| H  | -1.71734 | -1.52924 | 2.796238 |
| C  | -1.26265 | -2.3473  | 0.866899 |
| C  | -0.62134 | -2.16954 | -0.37794 |
| C  | -1.69167 | -3.62447 | 1.23299  |
| C  | -0.41069 | -3.27288 | -1.20996 |
| C  | -1.48854 | -4.71968 | 0.398946 |
| H  | -2.18753 | -3.76252 | 2.189926 |
| C  | -0.84026 | -4.53729 | -0.82169 |
| H  | 0.094357 | -3.11709 | -2.15656 |
| H  | -1.82908 | -5.70476 | 0.699141 |
| H  | -0.6712  | -5.38425 | -1.47928 |
| N  | -2.26348 | -0.07263 | 1.311792 |
| H  | -2.16237 | 0.709302 | 1.956756 |
| Se | -3.56817 | 1.200053 | -1.36255 |
| Zn | -1.47063 | 0.618822 | -0.51702 |
| O  | -0.22404 | -0.9301  | -0.75211 |
| O  | 0.283111 | 1.494849 | -0.21577 |
| C  | 0.607326 | 2.766418 | 0.110173 |
| C  | -0.16502 | 3.836671 | -0.35886 |
| C  | 1.724067 | 3.029628 | 0.93404  |
| C  | 0.162507 | 5.147796 | -0.03239 |
| H  | -1.03083 | 3.622114 | -0.9772  |
| C  | 2.040895 | 4.356991 | 1.236022 |
| C  | 1.274225 | 5.417505 | 0.76259  |
| H  | -0.45135 | 5.960155 | -0.40821 |
| H  | 2.904076 | 4.560053 | 1.864371 |
| H  | 1.53979  | 6.43865  | 1.013049 |
| C  | 2.537447 | 1.907946 | 1.536204 |
| H  | 1.932748 | 1.308588 | 2.225453 |
| H  | 3.356965 | 2.34004  | 2.118979 |
| N  | 3.051927 | 0.988908 | 0.496743 |
| H  | 3.465866 | 1.543506 | -0.25252 |
| C  | 3.998641 | -0.04183 | 0.865438 |
| C  | 4.278811 | -1.02282 | -0.10986 |
| C  | 4.601628 | -0.10659 | 2.120753 |
| C  | 5.205097 | -2.02289 | 0.196395 |
| C  | 5.508682 | -1.12337 | 2.413565 |
| H  | 4.375634 | 0.635344 | 2.877623 |
| C  | 5.819006 | -2.07307 | 1.444996 |
| H  | 5.426096 | -2.78007 | -0.54764 |
| H  | 5.971781 | -1.1639  | 3.393743 |
| H  | 6.527557 | -2.86553 | 1.6634   |
| Se | 3.387102 | -1.01097 | -1.83045 |
| Zn | 1.535397 | -0.00865 | -0.71297 |

## References

1. A. J. Bard, L. R. Faulkner, *Electrochemical Methods: Fundamentals and Applications*; Wiley: New York, 2001.
2. E. Laviron, *J. Electroanal. Chem.* 1979, **101**, 19–28
3. J. M. Saveant, E. Vianello, *Electrochimica Acta* **1965**, *10*, 905–920.
4. A. D. Wilson, R. H. Newell, M. J. McNevin, J. T. Muckerman, M. R. DuBois, D. L. DuBois, *J. Am. Chem. Soc.* 2006, *128*, 358–366.
5. A. M. Appel, D. L. DuBois, M. R. DuBois, *J. Am. Chem. Soc.* **2005**, *127*, 12717–12726.
6. Z. Chen, J. J. Concepcion, H. Luo, J. F. Hull, A. Paul, T. J. Meyer, *J. Am. Chem. Soc.* 2010, **132**, 17670–17673
7. S. J. Balkrishna, B. S. Bhakuni, S. Kumar, *Tetrahedron* 2011, **67**, 9565–.
8. V. Rathore, A. Upadhyay, S. Kumar, *Org. Lett.* 2018, **20**, 6274–6278.
9. M. J. Frisch, G. W. Trucks, H. B. Schlegel *et. al.* *Gaussian, Inc., Wallingford CT*, 2009
